*Regulation of Na<sup>+</sup>,K<sup>+</sup>-ATPase and FXYP1 by training and water immersion*

**Title (150 characters):**

Regulation of Na<sup>+</sup>,K<sup>+</sup>-ATPase isoforms and phospholemman (FXYP1) in skeletal muscle fibre types by exercise training and cold-water immersion in men

**Authors:**

Danny Christiansen <sup>1</sup>, Robyn M. Murphy <sup>2</sup>, James R. Broatch <sup>1</sup>, Jens Bangsbo<sup>3</sup>, Michael J. McKenna<sup>1</sup>, David J. Bishop <sup>1,4</sup>

**Affiliations:**

<sup>1</sup> Institute of Sport, Exercise and Active Living (ISEAL), Victoria University, Melbourne, Victoria, 3011, Australia. <sup>2</sup> Department of Biochemistry and Genetics, La Trobe Institute for Molecular Science, La Trobe University, Melbourne, Victoria, 3086, Australia. <sup>3</sup> Department of Nutrition, Exercise and Sports (NEXS), University of Copenhagen, 2200 Copenhagen N, Denmark. <sup>4</sup> School of Medical and Health Sciences, Edith Cowan University, Perth, Australia

**Three keywords for use in review process:**

Cold-water immersion, Na<sup>+</sup>,K<sup>+</sup>-ATPase, single-fibre western blotting

**Table of Contents category: "Muscle"**

**Corresponding Author:**

Robyn M. Murphy, Department of Biochemistry and Genetics, La Trobe Institute for Molecular Science, La Trobe University, Melbourne, Victoria, 3086, Australia.  
Email: [R.Murphy@latrobe.edu.au](mailto:R.Murphy@latrobe.edu.au)

**Summary in key points (150 words):**

- It is unclear how Na<sup>+</sup>,K<sup>+</sup>-ATPase (NKA) isoforms are regulated in different skeletal muscle fibre types by exercise training in humans, and the effect on phospholemman (FXYP1) protein abundance in different fibre types remains to be elucidated. We investigated the impact of six weeks of training on NKA-isoform protein abundance ( $\alpha_{1-3}$ ,  $\beta_{1-3}$  and FXYP1) in type I and II muscle fibres in men.
- We show that intense interval training selectively increases the protein content of NKA  $\alpha_1$  and  $\beta_3$  in both fibre types,  $\beta_1$  in type II fibres, and decreases FXYP1 in type I fibres.

# *Regulation of Na<sup>+</sup>,K<sup>+</sup>-ATPase and FXYP1 by training and water immersion*

- These results suggest the favourable impact of intense training on human muscle Na<sup>+</sup>/K<sup>+</sup> regulation could be attributable, in part, to fibre type-dependent modulation of NKA-isoform abundance.
- Given that cold exposure has been shown to modulate cellular redox state, which has been linked to increased NKA expression, we also investigated the effect of exercise training plus cold-water immersion (CWI) on the fibre type-specific responses of NKA isoforms and FXYP1. We found that CWI was without effect on the responses to training.

## **Abstract (250 words)**

Little is understood about the fibre type-dependent regulation of Na<sup>+</sup>,K<sup>+</sup>-ATPase (NKA) isoforms by exercise training in humans. The main aim of this study was therefore to assess the impact of a period of repeated exercise sessions on NKA-isoform protein abundance in different skeletal muscle fibre types in men. Post-exercise cold-water immersion (CWI) has been reported to increase oxidative stress, which may be one mechanism underlying increases in NKA-isoform expression. Thus, a second aim was to evaluate the effect of CWI on training-induced modulation of NKA-isoform abundance. Vastus lateralis muscle biopsies were obtained from nineteen men at rest before (Pre) and after (Post) six weeks of intense interval cycling, with training sessions followed by passive rest (CON, n=7) or CWI (10°C; COLD, n=5). Training increased (p<0.05) the abundance of NKAα<sub>1</sub> and NKAβ<sub>3</sub> in both type I and type II fibres, NKAβ<sub>1</sub> in type II fibres, but was without effect on NKAα<sub>2</sub> and NKAα<sub>3</sub> (p>0.05). Furthermore, training decreased FXYP1 protein content in type I fibres, which abolished its fibre type-specific expression detected at Pre (p<0.05). CWI was without impact on the responses to training (p>0.05). These results highlight that NKA isoforms are regulated in a fibre type-dependent fashion in response to intense training in humans. This may partly explain the improvement in muscle Na<sup>+</sup>/K<sup>+</sup> handling after a period of intense training. CWI may be performed without adversely or favourably affecting training-induced changes in NKA-isoform abundance.

## **Abbreviations**

AMPKβ<sub>2</sub>, 5' AMP-activated protein kinase subunit β<sub>2</sub>; CaMKII, Ca<sup>2+</sup>-calmodulin-dependent protein kinase isoform 2; COLD, cold-water immersion group; CON, control group; C<sub>t</sub>, cycle threshold; CV, coefficient of variation; CWI, cold-water immersion; EDL, extensor digitorum longus; FXYP1, phospholemman isoform 1; HSP70, heat-shock protein 70; GXT, graded exercise test; K<sup>+</sup>, potassium; K<sub>m</sub>, Michaelis–Menten constant; MHC, myosin heavy chain; Na<sup>+</sup>, sodium; NF-1, neurofibromatosis type 1; NKA, Na<sup>+</sup>,K<sup>+</sup>-ATPase; ROS, reactive oxygen species; SDS-PAGE, sodium dodecyl sulphate polyacrylamide gel electrophoresis; SERCA1, sarco/endoplasmic reticulum Ca<sup>2+</sup>-ATPase isoform 1; VO<sub>2peak</sub>, maximum oxygen uptake.

# Regulation of Na<sup>+</sup>,K<sup>+</sup>-ATPase and FXYP1 by training and water immersion

## Introduction

Skeletal muscle contractions invoke a cellular loss of potassium (K<sup>+</sup>) and a gain in sodium (Na<sup>+</sup>) ions, which has been associated with impaired muscle force development (McKenna *et al.*, 2008). These Na<sup>+</sup> and K<sup>+</sup> fluxes are counterbalanced, primarily, by one single, active transport system - the Na<sup>+</sup>,K<sup>+</sup>-ATPase (NKA) (Clausen, 2003). In skeletal muscle, the active NKA complex is composed of a catalytic  $\alpha$ , a structural and regulatory  $\beta$ , and an accessory (phospholemman; FXYP) subunit (Clausen, 2013). Each of these subunits is expressed as different isoforms in both type I and II human skeletal muscle fibres ( $\alpha_{1-3}$ ,  $\beta_{1-3}$  and FXYP1) (Thomassen *et al.*, 2013; Wyckelsma *et al.*, 2015). It has been shown in rats that differences in NKA-isoform abundance between these fibre types could be responsible for the discrepancy between muscles in their capacity for Na<sup>+</sup> and K<sup>+</sup> transport (Kristensen & Juel, 2010a). Thus, fibre-type specific study of NKA adaptation is fundamentally important to understand the regulation of Na<sup>+</sup>/K<sup>+</sup> homeostasis and muscle function.

One study has investigated training-induced effects on NKA-isoform abundance in isolated type I and II muscle fibres from humans. In that study, Wyckelsma *et al.* (2015) found no effect of four weeks of repeated-sprint training (12 sessions of three sets of 5 x 4-s running sprints with 20 s of rest between sprints and 4.5 min of rest between sets) on  $\alpha$ -isoform abundance ( $\alpha_1$ ,  $\alpha_2$  and  $\alpha_3$ ). In contrast, the abundance of these isoforms has been reported to change in whole-muscle samples in response to a substantially (~12-18 times) greater training volume (Mohr *et al.*, 2007; Iaia *et al.*, 2008; Bangsbo *et al.*, 2009). Thus, the chosen volume and duration of training may have reduced the likelihood of detecting changes in NKA with training in the study by Wyckelsma *et al.* (2015). It is by no means clear how the NKA isoforms are regulated by exercise training in the different fibre types in humans, and the effect of exercise training on FXYP1 abundance in different muscle fibre types remains to be elucidated.

There is great interest in the use of cold-water immersion (CWI) to optimise muscle recovery, and how it may affect adaptations to exercise training (Versey *et al.*, 2013; Broatch *et al.*, 2014; Roberts *et al.*, 2015). But no study has investigated the effect of post-exercise CWI on muscle NKA protein content. In humans, cold exposure has been shown to increase the systemic level of norepinephrine (Gregson *et al.*, 2013), which has been linked to greater oxidative stress (Juel *et al.*, 2015). In many cell types, cold exposure has also been reported to perturb redox homeostasis and increase the production of reactive oxygen species (ROS) (Selman *et al.*, 2002). Given these cellular stressors could be important for the isoform-dependent modulation of NKA-isoform expression in response to exercise in humans (Murphy *et al.*, 2008), post-exercise CWI may be a potent stimulus to affect NKA-isoform content in humans. However, this hypothesis remains currently untested.

*Regulation of Na<sup>+</sup>,K<sup>+</sup>-ATPase and FXYP1 by training and water immersion*

The aims of the present study were to evaluate the effect of exercise training on NKA-isoform protein abundance ( $\alpha_{1-3}$ ,  $\beta_{1-3}$  and FXYP1) in type I and type II skeletal muscle fibres in humans and to examine if these adaptations could be modified by post-exercise CWI. In addition, as limited information is available on the reliability of western blotting for NKA isoforms, and to support our interpretation of data, we determined the technical error of this method for each of the NKA isoforms.

# Regulation of Na<sup>+</sup>,K<sup>+</sup>-ATPase and FXD1 by training and water immersion

## Methods

### *Ethical Approval*

This study was approved by the Human Research Ethics Committee of Victoria University, Australia (HRE12-335) and conformed to the Declaration of Helsinki. The participants received a detailed oral and written, plain-language explanation of the procedures, potential risks, and benefits associated with the study before providing oral and written consent.

### *Participants*

Nineteen healthy males volunteered to participate in this study. Their age, body mass, height and peak oxygen uptake ( $\dot{V}O_{2peak}$ ) were (mean  $\pm$  SD) 24  $\pm$  6 y, 79.5  $\pm$  10.8 kg, 180.5  $\pm$  10.0 cm and 44.6  $\pm$  5.8 mL $\cdot$ kg<sup>-1</sup> $\cdot$ min<sup>-1</sup>, respectively. The participants were non-smokers and engaged in physical activity several days per week, but were neither specifically nor highly trained.

### *Experimental design*

Before the first biopsy session, participants reported to the laboratory on two separate occasions to be accustomed to the exercise protocol and recovery treatments. During this period, they also performed a graded exercise test (GXT) to volitional exhaustion on an electromagnetically-braked cycle ergometer (Lode, Groningen, The Netherlands) and their  $\dot{V}O_{2peak}$  was assessed in accordance with published methods (Broatch *et al.*, 2014). These visits were concluded at least 3 days prior to the first biopsy session and separated by a minimum of 24 h. We utilised a parallel, two-group, longitudinal study design (Fig. 1). Participants were matched on their pre-determined  $\dot{V}O_{2peak}$  and randomly assigned by a random-number generator (Microsoft Excel, MS Office 2013), in a counter-balanced fashion, to one of two recovery treatments: Cold-water immersion (COLD,  $n$  = 9) or non-immersion rest at room temperature (CON,  $n$  = 10). The assigned recovery protocol was performed upon completion of every intense, sprint interval exercise session during the six weeks of training. A muscle biopsy was obtained at rest before the first, (Pre) and approximately 48-72 h after the last (Post), training session. These samples were used to determine protein abundance in type I and II muscle fibres. This study was part of a larger research project investigating the effects of post-exercise CWI on muscle adaptation in humans. Due to insufficient size of some muscle biopsies allocated to this part of the study, protein abundance was determined in twelve of these participants (CON,  $n$  = 7; COLD,  $n$  = 5).

### *Exercise protocol and training*

All experimental and training sessions took place in the Exercise Physiology Laboratory at the Institute of Sport, Exercise and Active Living (ISEAL), Victoria University (Melbourne, Australia). The

# *Regulation of Na<sup>+</sup>,K<sup>+</sup>-ATPase and FXD1 by training and water immersion*

participants completed the first training session on the same electrically-braked cycle ergometer as used during the familiarisation. After a 5-min warm-up at a constant absolute intensity (75 W), the participants performed four 30-s maximal-intensity ('all-out') sprint efforts at a constant relative flywheel resistance of 7.5 % of body mass, interspersed by 4 min of passive recovery in which they remained seated with their legs resting in the pedals. Each effort was commenced from a flying start at ~120 rpm, brought about by the investigators' manual acceleration of the flywheel before each effort. The participants remained seated in the saddle throughout the entire session. Augmented verbal feedback was provided to the participants by one investigator in a consistent manner throughout each effort. This protocol was repeated in every training session and was performed under standard laboratory conditions (~23°C, ~35% relative humidity). To ensure a progressive physiological stimulus, participants performed four sprint repetitions in weeks 1-2, five in weeks 3-4, and six in weeks 5-6. Pedal resistance was modified (7.5-9.5% of body mass) during training to ensure a minimum fatigue-induced decline in mean power output of 20 W·s<sup>-1</sup>.

## *Recovery treatments*

Five minutes after termination of the sprint interval exercise, participants commenced their designated 15-min recovery treatment, consisting of either rest in a seated posture with the legs fully extended on a laboratory bed at room temperature (~23°C, CON) or 10°C water immersion up to the umbilicus in the same position in an inflatable bath (COLD; iBody, iCool Sport, Miami QLD, Australia). The water temperature was held constant by a cooling unit (Dual Temp Unit, iCool Sport, Miami QLD, Australia) with constant agitation.

## *Muscle sampling*

Muscle was sampled from the *vastus lateralis* muscle of the participants' right leg using a 5-mm Bergström needle with suction. In preparation, a small incision was made at the muscle belly through the skin, subcutaneous tissue and fascia under local anaesthesia (5 ml, 1% Xylocaine). Separate incisions were made for each biopsy and separated by approximately 1-2 cm to help minimise interference of prior muscle sampling on the physiological response. The participants rested on a laboratory bed during each sampling procedure and the biopsies were obtained after ~30 min of rest in the supine position. Immediately after sampling, samples were rapidly blotted on filter paper to remove excessive blood, and instantly frozen in liquid nitrogen. The samples were then stored at -80°C until subsequent analyses. The incisions were covered with sterile Band-Aid strips and a waterproof Tegaderm film dressing (3M, North Ryde, Australia).

# *Regulation of Na<sup>+</sup>,K<sup>+</sup>-ATPase and FXD1 by training and water immersion*

## *Dissection of single-fibre segments*

Skeletal muscle single-fibre segments were collected and prepared for western blotting as previously described (Murphy, 2011). Approximately 105 (range: 17-218) mg w.w. of muscle was freeze dried for 28 h, providing 24 (3.4-49.0) mg d.w. muscle for dissection of individual fibres. By use of fine jeweller's forceps, a minimum of 20 single-fibre segments were separated from each biopsy sample in a petri dish under a light microscope at room temperature (~45-60 min per biopsy). A camera (Moticam 2500, Motic Microscopes) attached to a monitor was connected to the microscope to manually measure, by use of a ruler, the length of each fibre segment. The mean (range) segment length was 1.5 (1.0-3.2) mm and a total of 520 fibre segments were collected. After dissection, segments were placed in individual microfuge tubes with the use of forceps and incubated for 1 h at room temperature in 10  $\mu$ L SDS buffer (0.125 M Tris-HCl, 10% glycerol, 4% SDS, 4 M urea, 10% mercaptoethanol, and 0.001% bromophenol blue, pH 6.8), after which they were stored at -20 °C until analysed.

## *Preparation of muscle fibre pools*

One half of each solubilised fibre segment was used to qualitatively determine fibre type by western blotting with antibodies against MHC I and II (see section on *Immunoblotting*). The other half of each fibre segment was grouped with other fibre segments from the same biopsy according to MHC expression, to form samples of type I or II fibres from each biopsy, similar to the procedure described previously (Kristensen *et al.*, 2015). The mean  $\pm$  SD number of fibre segments analysed per participant was 36  $\pm$  3 (427 segments in total). The number of fibre segments included in each pool of fibres per biopsy before and after training, respectively, was 8 (range 4-14) and 5 (range 2-10) for pools of type I, and 10 (range 6-13) and 12 (range 7-16) for pools of type II, fibres. Hybrid fibres (i.e., expressing multiple MHCI and IIa isoforms) were excluded from analysis ( $n = 22$ , ~4 %). Type IIx fibres, classified by a lack of MHC I and II content despite protein present in the sample, were also excluded ( $n = 5$ , < 1%). Some lanes on the Stain Free gel were empty, indicating that no fibre was successfully transferred into the microfuge tube ( $n = 8$ , ~1.5 %). Based on agreement between two independent researchers, who conducted visual inspections of the blots, fibre segments and points on the calibration curves were excluded from analysis if their band was unable to be validly quantified due to noise on the image caused by artefacts or if they were too faint or were saturated.

## *Calibration curves*

To be able to compare across gels, and to ensure that blot density was within a linear range of detection (Murphy & Lamb, 2013), a four-point calibration curve of whole-muscle crude homogenate with a known amount of protein was loaded onto every gel. The homogenate was prepared from an equal number ( $n = 5$ ) of pre- and post-training freeze-dried, fibre-type heterogeneous muscle



# *Regulation of Na<sup>+</sup>,K<sup>+</sup>-ATPase and FXD1 by training and water immersion*

samples. The samples were manually powdered using a Teflon pestle in an Eppendorf tube and then incubated for 1 h at room temperature in SDS buffer (0.125 M Tris-HCl, 10% glycerol, 4% SDS, 4 M urea, 10% mercaptoethanol, and 0.001% bromophenol blue, pH 6.8). The protein concentration of the homogenate was estimated by Stain Free gel electrophoresis (Bio-Rad, Hercules, CA). The intensity of the protein bands was compared to a standard curve of mixed human muscle homogenate with a known protein concentration.

## *Immunoblotting*

To determine MHC isoform abundance in each fibre segment, half the solubilised segment (5 µL) was loaded onto 26-wells, 4-15% or 4-20% Criterion TGX Stain Free gels (Bio-Rad Laboratories, Hercules, CA). Each gel was loaded with 20 segments from the same participant ( $n = 10$  for pre and post training), two protein ladders (PageRuler, Thermo Fisher Scientific) and a calibration curve. NKA  $\alpha_{1-3}$ ,  $\beta_{1-3}$ , and FXD1 protein in the muscle fibre pools was quantified by loading 15 µg w.w. muscle per sample, along with a calibration curve, onto the same gel using the same gel type as per above. Pools of type I and II fibres from Pre and Post from the same participant were loaded onto the same gel. Gel electrophoresis was performed at 200 V for 45 min. After UV activation for 5 min on a Criterion Stain Free Imager (Bio-Rad), proteins in gels were wet-transferred to 0.45 µm nitrocellulose membrane for 30 min at 100 V in a circulating, ice-cooled bath using transfer buffer (25 mM Tris, 190 mM glycine and 20% methanol). The current was on average ~0.50-0.75 mA and did not exceed 0.95 mA. After transfer, membranes were incubated for 10 min in Pierce Miser solution (Pierce, Rockford, IL, USA), washed five times in double-distilled H<sub>2</sub>O, and blocked for 1.5 h in blocking buffer (5% non-fat milk in Tris-buffered saline Tween, TBST) at room temperature with rocking. Membranes containing fibre pools were cut horizontally at 170 kDa, 70 kDa and 25 kDa to re-determine fibre type (MHC isoforms, ~200 kDa) and to quantify one NKA  $\alpha$  isoform (~100 kDa), along with one  $\beta$  isoform (~50 kDa) and FXD1 (~12 kDa) on the same membrane. Membranes were incubated with rocking overnight at 4°C (preceded or followed by 2 h at room temperature) in primary antibody diluted in 1% bovine serum albumin (BSA) in phosphate-buffered saline with 0.025% Tween (PBST) and 0.02% NaN<sub>3</sub> at concentrations detailed in Table 3. To improve the visualisation of fibre type, the top portions of each membrane (>170 kDa) were stripped between MHCIIa (1<sup>st</sup>) and MHCI (2<sup>nd</sup>) probes for 30 min at 37 °C in western blot stripping buffer (#21059, Thermo Fisher Scientific, MA USA). NKA isoforms were quantified as first probes, except for  $\alpha_2$  and  $\beta_3$ , which were quantified as second probes following quantification of  $\alpha_1$  and  $\beta_1$ , respectively. Use of different host species for  $\alpha_1$  (mouse) and  $\alpha_2$  (rabbit), and the distinct molecular bands of  $\beta_1$  and  $\beta_3$  allowed their quantitative assessment on the same membrane. No stripping of these membrane portions were performed. After incubation in primary antibody, membranes were washed three times in TBST and incubated for 1 h at room temperature in horseradish peroxidase (HRP)-conjugated



# *Regulation of Na<sup>+</sup>,K<sup>+</sup>-ATPase and FXYP1 by training and water immersion*

secondary antibody (goat anti-mouse immunoglobulins or goat anti-rabbit immunoglobulins; Pierce, Rockford, IL, USA) diluted 1:20.000 with 5 % non-fat milk. After another three membrane washes in TBST, protein bands were visualised using enhanced chemiluminescence (SuperSignal West Femto, Rockford, Pierce, IL, USA) on a ChemiDoc MP imaging system (Bio-Rad). Quantification of bands was performed in Image Lab 5.2.1 (Bio-Rad). Linearity between blot signal (density) and tissue loaded for calibration curves was established on every membrane. The same researcher was responsible for performing all western blots included in this study.

## *Antibodies for immunoblotting*

Full details for the primary antibodies are shown in Table 1. Validation of antibodies is shown in Fig. 2 and was performed with positive and negative controls using mouse (EDL, soleus and brain), rat (EDL, soleus, brain, kidney and cardiac muscles) and human (breast cancer cell lines, embryonic kidney cells and skeletal muscle) tissues. The rats (Sprague Dawley, six months old) and mice were sedentary and healthy. Rat and mouse tissue was obtained from animals used under La Trobe University Animal Ethics Committee (approval AEC 14-33). Antibodies used to detect myosin heavy chain slow- (type I, #A4.840) and fast-type (type IIa, #A4.74) isoforms were produced using the entire immunogen sequence (MYH7 and MYH2, respectively). The former antibody recognises a C-terminus epitope, whilst the latter remains to be mapped (DSHB).

## *Reliability of western blotting*

The reproducibility of western blotting for each of the NKA isoforms and FXYP1 was determined from triplicate western blots for each of the proteins and is expressed as the coefficient of variation (CV; Fig. 3C). The calibration curves from whole-muscle, crude homogenate, which were loaded on every gel, were used for the analysis. Protein abundance and total protein for each amount of protein loaded was determined by normalising the density for a given loading amount to that of the slope of the calibration curves.

## *Statistical analysis*

Statistical analyses were performed in Sigma Plot (Version 11.0, Systat Software, CA). Data was assessed for normality using the Shapiro-Wilk test. An appropriate transformation was used, if required, to ensure a normal distribution of data before subsequent analysis. A two-way repeated-measures (RM) ANOVA was used to evaluate the effects of time (Pre, Post) and fibre type (I and II) within group and using data from both groups (pooled data). A one-way ANOVA was used to assess the effect of group (COLD vs. CON) on Pre to Post change in protein content within fibre type (I and II). Data normalised to total protein, and not relative changes, were used for these analyses. Where

# *Regulation of Na<sup>+</sup>,K<sup>+</sup>-ATPase and FXD1 by training and water immersion*

applicable, multiple pairwise, *post hoc*, comparisons used the Tukey test. Cohen's conventions were adopted for interpretation of effect size (*d*), where <0.2, 0.2-0.5, >0.5-0.8 and >0.8 were considered as trivial, small, moderate and large, respectively (Cohen, 1988). Data are reported as geometric mean  $\pm$  95% confidence intervals (CI95) in figures. Note that the protein expression at Pre is not equal to 1.0 due to the nature of using geometric means. F statistic (F), and *d*  $\pm$  CI95 are shown for time and fibre-type effects, as well as group interactions. The  $\alpha$ -level was set at  $p \leq 0.05$ .

## **Results**

In figures, individual data are displayed on the left with each symbol representing the same participant for all isoforms. On the right, geometric means  $\pm$  CI95 are shown. Fold-changes are reported relative to participants' geometric mean at Pre in type I fibres in CON.

### *Validation of antibodies for immunoblotting*

The results from our antibody validation are shown in Fig. 2.

The isoform specificity of the NKA  $\alpha_1$  monoclonal antibody (#a6F) was verified using rat kidney and brain as positive controls (Fig. 2A). Our results support previous findings in similar tissues (Arystarkhova & Sweadner, 1996). We were also able to replicate the muscle type-specific distribution of  $\alpha_1$  observed previously in rat skeletal muscles using other  $\alpha_1$  antibodies (Lucchesi & Sweadner, 1991; Fowles *et al.*, 2004).

Specificity of the NKA  $\alpha_2$  polyclonal antibody (#07-674) was verified by a clear band at the predicted molecular weight (105 kDa) in human and rat skeletal muscles, rat cardiac muscle and brain (Fig. 2B). These findings support previous results in the same tissues (Lucchesi & Sweadner, 1991; Thompson & McDonough, 1996; Wyckelsma *et al.*, 2015). We found that  $\alpha_2$  was absent in rat kidney, which also corroborates with the literature (Hundal *et al.*, 1994; Lavoie *et al.*, 1996; Crambert *et al.*, 2002). BLAST analysis of the peptide sequence specific to the  $\alpha_2$  antibody (#07-674, lot #2444088; aa sequence 432-445, human) revealed no cross reactivity with other NKA isoforms.

NKA  $\alpha_3$  protein is highly expressed in rat brain (Lavoie *et al.*, 1997), but absent in rat cardiac muscle (Lucchesi & Sweadner, 1991; Sweadner *et al.*, 1994) and kidney (Hundal *et al.*, 1994). One study has shown that  $\alpha_3$  may be absent also in rat skeletal muscle (Lavoie *et al.*, 1997). By use of the monoclonal NKA  $\alpha_3$  antibody (#MA3-915), we support these previous findings (Fig. 2C). The multiple bands in human skeletal muscle could indicate multiple splice variants, as observed previously (Tumlin *et al.*, 1994).

# *Regulation of Na<sup>+</sup>,K<sup>+</sup>-ATPase and FXYD1 by training and water immersion*

The monoclonal NKA  $\beta_1$  antibody (#MA3-930) has been used previously in this journal to quantify  $\beta_1$  protein in human muscle samples despite no clear evaluation of specificity of the lot used (Murphy *et al.*, 2004). As  $\beta_1$  protein is heavily glycosylated (Vagin *et al.*, 2006), and highly expressed in human cancer cell lines (Salyer *et al.*, 2013), we tested the specificity of our  $\beta_1$  antibody lot using deglycosylated (PNGase treated for 3 h) and control human crude skeletal muscle samples and two human breast cancer (MDA-MB-231 and MCF10.Ca1d) and control (HEKs, human embryonic kidney) cell lines (Fig. 2D). Our findings of a substantial downshift of the predicted  $\beta_1$  band in deglycosylated samples and the markedly higher density of the same band in cancer cell lines vs. HEKs strongly support the specificity of our antibody lot for  $\beta_1$  protein. BLAST analysis of the peptide sequence specific to the  $\beta_1$  antibody (#MA3-930; aa sequence 195-199, sheep) confirmed absence of cross reactivity with other NKA isoforms.

Specificity of the polyclonal NKA  $\beta_2$  antibody (#22338-1-AP) was supported by detection of recombinant  $\beta_2$  protein (#Ag17818, ProteinTech; Fig. 2E, bottom panel). In further support, our antibody was able to detect a band at the predicted molecular weight in our positive (rat brain), but not in our negative (rat cardiac muscle), control sample. It also revealed a muscle type-specific expression of  $\beta_2$  in rat (Fig. 2E), in line with what has been found previously (Fowles *et al.*, 2004; Kristensen & Juel, 2010b). BLAST analysis of the peptide sequence specific to the  $\beta_2$  antibody lot used in the present study revealed that it did not cross react with other NKA isoforms.

Using the monoclonal NKA  $\beta_3$  antibody (#610992), we detected a band at the predicted molecular weight in human muscle (albeit weak in our whole-muscle, crude homogenate), rat soleus and cardiac muscle and kidney (Fig. 2F). Presence of  $\beta_3$  protein in rat kidney is in coherence with presence of  $\beta_3$  gene transcripts in the same tissue (Malik *et al.*, 1996). We found that  $\beta_3$  protein was absent in rat EDL muscle and brain, suggesting tissue-specific expression at the protein level.

Specificity of the polyclonal FXYD1 antibody (#13721-1-AP) was supported by detection of a band at the predicted molecular weight for our positive controls (human and rat skeletal muscles, rat cardiac muscle and kidney; Fig. 2G). FXYD1 is either not expressed or very lowly expressed in central nervous tissue (Crambert *et al.*, 2002). In accordance, we did not detect it in rat brain. The higher density of the band in rat soleus vs. EDL muscle supports previous findings (Rasmussen *et al.*, 2008). The longer migration of FXYD1 in the human vs. rat tissues could indicate specie- or case-specific differences in post-translational modification, such as phosphorylation (Fuller *et al.*, 2009; Thomassen *et al.*, 2016). BLAST analysis of the peptide sequence specific to the FXYD1 antibody (sequence 1-92 encoded by BC032800) showed no signs of cross reactivity with NKA isoforms.

# *Regulation of Na<sup>+</sup>,K<sup>+</sup>-ATPase and FXD1 by training and water immersion*

## *Western blotting technical error*

The points constituting calibration curves on gels were strongly correlated ( $r^2 \geq 0.98$ ,  $n = 22$  gels, Fig. 3A). Representative blots for these curves are shown in Fig. 3B. The reproducibility of western blotting for each of the NKA isoforms and FXD1 is shown in Fig. 3C. The technical error for these isoforms were ~10-30 % for the protein loading amount used (1.5 fibre worth of protein), isoform-dependent, and for most isoforms inversely related to the amount of protein loaded on each gel (Fig. 3C).

## *Representative blots and verification of fibre type of fibre pools*

Representative blots for training-induced effects on protein abundance, and verification of fibre type of fibre pools are shown in Fig. 4. It is clear from these results that fibres were grouped correctly, confirmed by the clear difference in MHC-isoform expression between type I and II fibre pools.

## *Na<sup>+</sup>,K<sup>+</sup>-ATPase $\alpha_1$ , $\alpha_2$ , and $\alpha_3$*

In CON,  $\alpha_1$  protein increased with training (main effect for time:  $F = 19.78$ ;  $p = 0.004$ ;  $d = 1.41 \pm 0.77$ ;  $n = 7$ ) in both type I ( $p = 0.008$ ;  $d = 1.20 \pm 0.80$ ) and II fibres ( $p = 0.002$ ;  $d = 1.56 \pm 0.78$ ). Similarly, in COLD,  $\alpha_1$  protein increased with training (main effect for time:  $F = 8.66$ ;  $p = 0.042$ ;  $d = 1.55 \pm 0.81$ ;  $n = 4$ ) in both type I ( $p = 0.053$ ;  $d = 1.40 \pm 0.85$ ) and II fibres ( $p = 0.029$ ;  $d = 1.61 \pm 0.82$ ). The increase in  $\alpha_1$  protein was not different between groups in both fibre types (type I:  $p = 0.607$ ;  $d = 0.07 \pm 0.04$ ; type II:  $p = 0.348$ ;  $d = 0.36 \pm 0.21$ ; Fig. 5A). In both groups,  $\alpha_2$  protein remained unchanged with training (main effect for time in CON:  $F = 3.65$ ;  $p = 0.105$ ;  $d = 0.34 \pm 0.33$ ;  $n = 7$ ; and in COLD:  $F = 0.69$ ;  $p = 0.452$ ;  $d = 0.48 \pm 0.34$ ;  $n = 5$ ; Fig. 5B). Based on the pooled data (both groups),  $\alpha_2$  protein remained unchanged with training in both fibre types (type I:  $p = 0.161$ ,  $n = 12$ ; type II:  $p = 0.112$ ,  $n = 12$ ). Based on the same data,  $\alpha_2$  protein was  $17 \pm 46$  % more abundant in type II, compared to type I, fibres (main effect for fibre type:  $F = 9.63$ ;  $p = 0.010$ ;  $d = 0.38 \pm 0.26$ ;  $n = 12$ ). The  $\alpha_3$  protein remained unchanged in both groups with training (main effect for time in CON:  $F = 3.71$ ;  $p = 0.103$ ;  $d = 0.53 \pm 0.52$ ;  $n = 7$ ; and in COLD:  $F = 0.55$ ;  $p = 0.501$ ;  $d = 0.03 \pm 1.02$ ;  $n = 5$ ; Fig. 5C).

## *Na<sup>+</sup>,K<sup>+</sup>-ATPase $\beta_1$ , $\beta_2$ , and $\beta_3$*

$\beta_1$  protein remained unchanged with training in both groups (main effect for time in CON:  $F = 1.25$ ;  $p = 0.306$ ;  $d = 0.37 \pm 0.45$ ;  $n = 7$ ; and in COLD:  $F = 0.01$ ;  $p = 0.960$ ;  $d = 0.10 \pm 0.58$ ;  $n = 5$ ; Fig. 6A). Based on the pooled data (both groups),  $\beta_1$  protein increased by  $44 \pm 75$  % in type II fibres with training ( $p = 0.038$ ;  $d = 0.53 \pm 0.35$ ), but remained unchanged in type I fibres ( $p = 0.149$ ;  $d = 0.29 \pm 0.24$ ). Using the same data,  $\beta_1$  protein was  $62 \pm 80$  % more abundant in type II than in type I

# *Regulation of Na<sup>+</sup>,K<sup>+</sup>-ATPase and FXYP1 by training and water immersion*

fibres at Post ( $p = 0.003$ ;  $d = 0.77 \pm 0.45$ ,  $n = 12$ ). As our western blots did not allow for quantitative assessment of training-induced effects on NKA  $\beta_2$  protein abundance, these data were excluded from analysis and are not presented. A representative blot is shown in Fig. 4E. Based on the pooled data (both groups),  $\beta_2$  protein was  $54 \pm 95$  % more abundant in type II, compared to type I, fibres (main effect for fibre type:  $F = 14.84$ ;  $p = 0.003$ ;  $d = 0.56 \pm 0.56$ ;  $n = 11$ ). In CON,  $\beta_3$  protein increased with training (main effect for time:  $F = 38.62$ ;  $p < 0.001$ ;  $d = 1.23 \pm 1.05$ ;  $n = 7$ ) in both type I ( $p = 0.003$ ;  $d = 1.18 \pm 0.97$ ) and II fibres ( $p < 0.001$ ;  $d = 1.24 \pm 1.15$ ). Similarly, in COLD,  $\beta_3$  protein increased with training (main effect for time:  $F = 22.40$ ;  $p = 0.009$ ;  $d = 1.18 \pm 2.93$ ;  $n = 5$ ) in both type I ( $p = 0.006$ ;  $d = 1.18 \pm 2.93$ ) and II fibres ( $p = 0.012$ ;  $d = 1.21 \pm 1.92$ ). The increase in  $\beta_3$  protein was not different between groups in either fibre type (group  $\times$  time interaction:  $F = 0.59$ ,  $p = 0.459$  for type I; and  $F = 0.04$ ,  $p = 0.854$  for type II). Based on the pooled data (both groups),  $\beta_3$  protein increased with training (main effect for time:  $F = 64.94$ ;  $p < 0.001$ ;  $d = 1.13 \pm 1.19$ ;  $n = 12$ ) in both type I ( $2.55 \pm 2.39$  fold;  $p < 0.001$ ;  $d = 1.07 \pm 1.35$ ) and II fibres ( $2.22 \pm 1.81$  fold;  $p < 0.001$ ;  $d = 1.22 \pm 1.03$ ; Fig. 6B).

## *Phospholemman (FXYP1)*

In both groups, FXYP1 protein also remained unchanged with training (main effect for time in CON:  $F = 1.56$ ,  $p = 0.258$ ,  $d = 0.66 \pm 0.34$ ,  $n = 7$ ; and in COLD:  $F = 0.23$ ,  $p = 0.654$ ,  $d = 1.17 \pm 0.27$ ,  $n = 5$ ). Based on the pooled data (both groups), FXYP1 protein decreased by  $33 \pm 40$  % in type I ( $p = 0.012$ ;  $d = 0.82 \pm 0.22$ ), but remained unchanged in type II fibres ( $p = 0.535$ ;  $d = 0.51 \pm 0.17$ ). Based on the same data, FXYP1 protein was  $35 \pm 35$  % more abundant in type I, compared to type II, fibres at Pre (main effect for fibre type:  $F = 6.31$ ;  $p = 0.020$ ;  $d = 1.01 \pm 0.57$ ;  $n = 12$ ), but not at Post ( $F = 0.79$ ;  $p = 0.384$ ;  $d = 0.31 \pm 0.17$ ;  $n = 12$ ; Fig. 6C).

# Regulation of Na<sup>+</sup>,K<sup>+</sup>-ATPase and FXVD1 by training and water immersion

## Discussion

The main novel findings, which are summarised in Fig. 7, were that six weeks of intense exercise training increased NKA  $\alpha_1$  and  $\beta_3$  protein abundance in both fibre types and  $\beta_1$  protein in type II fibres, but had no impact on  $\alpha_2$  and  $\alpha_3$  abundance in either fibre type. Furthermore, training decreased FXVD1 protein content in type I fibres and abolished its fibre type-dependent expression detected before training. These results support that improvements in muscle K<sup>+</sup> regulation after a period with repeated, intense exercise sessions in humans (McKenna, 1995; Nielsen *et al.*, 2004) may, in part, be attributable to fibre type-specific modulation of NKA-isoform protein abundance. This fibre type-dependent regulation of NKA could be one explanation for the dissociation between muscle NKA activity and whole-muscle NKA-isoform protein content previously reported after a period of intense training in humans (Aughey *et al.*, 2007). Furthermore, CWI neither adversely nor favourably affects training-induced adaptations in NKA-isoform abundance in different muscle fibre types. The technical error of western blotting for the NKA isoforms was ~10-30 % and isoform-dependent.

### *Regulation of NKA $\alpha$ isoforms in type I and II human muscle fibres by repeated-intense training*

A novel finding of the present study was that NKA  $\alpha_1$  protein abundance increased in both fibre types with training (>2 fold, Fig. 5A). This indicates that  $\alpha_1$  protein content may be regulated similarly in type I and II muscle fibres in response to sprint interval training in humans. In contrast, training was without effect on  $\alpha_2$  and  $\alpha_3$  protein content. No effect of sprint training on  $\alpha$ -isoform ( $\alpha_1$ ,  $\alpha_2$  and  $\alpha_3$ ) abundance has previously been detected in isolated type I and II human skeletal muscle fibres (Wyckelsma *et al.*, 2015), although the duration of both the sprints (4 s) and the training period (4 weeks) was shorter. However, other human studies have reported increases in [<sup>3</sup>H]-ouabain binding site content, reflecting increased  $\alpha$ -isoform content, with sprint interval training (McKenna *et al.*, 1993; Harmer *et al.*, 2006). Our present results suggest these increases in binding may, in part, be related to elevated  $\alpha_1$  protein content in both fibre types. While lack of sufficient muscle precluded measurement of [<sup>3</sup>H]-ouabain binding site content, our results support that increases in  $\alpha_1$  protein content may also be important for improvements in a muscle's capacity for K<sup>+</sup> regulation during repeated, intense exercise in humans (McKenna *et al.*, 1993).

Although there was not a significant increase in NKA  $\alpha_2$  protein content after training (pooled data:  $p < 0.07$ ,  $d = 0.42$ ),  $\alpha_2$  protein content was quantitatively higher in around three quarters of individual type I and II fibre pools. This suggests a possible upregulation in  $\alpha_2$  that was not detected due to inter-individual variability. Biological variability could perhaps also have influenced this result given the low number of fibre segments (range: 2-16) contained in each fibre pool. However, this explanation seems less likely, since AMPK $\beta_2$ , SERCA1 and actin can be validly quantified in pools



# *Regulation of Na<sup>+</sup>,K<sup>+</sup>-ATPase and FXD1 by training and water immersion*

consisting of 2-20 fibre segments, and pools of few segments ( $n = 4$ ) are reproducible for quantitative protein analysis (unpublished observation). In addition, consistent with a previous observation in recreationally active men (37 %; Thomassen *et al.*, 2013), we found higher  $\alpha_2$  protein content in type II vs. type I fibres (~17 %; Fig. 8B). This raises the possibility that the ion transport function of NKA may be fibre type-dependent in humans, in line with what has been shown in rats (Kristensen & Juel, 2010a). No fibre-type difference for  $\alpha_2$  protein content was detected in subjects with a substantially lower  $VO_{2peak}$  relative to our participants (Wyckelsma *et al.*, 2015). Thus, in humans, higher training status may be associated with greater type-II muscle fibre  $\alpha_2$  protein content.

Little is known about the relevance of NKA  $\alpha_3$  in skeletal muscles. Consistent with our current finding, the  $\alpha_3$  protein content remained unchanged at the whole-muscle level after 3 weeks of cycling (8 x 5-min at 85%  $VO_{2max}$ ) in well-trained men (Aughey *et al.*, 2007). Albeit not quantified in absolute terms, our validation blots for  $\alpha_3$  revealed that this isoform is lowly expressed at the protein level in human skeletal muscle (Fig. 2). This, along with the low  $\alpha_3$  mRNA expression detected previously in the same tissue (Aughey *et al.*, 2007), downplays the functional importance of  $\alpha_3$  for the muscle's contractile function in humans.

## *Regulation of NKA $\beta$ isoforms in type I and II human muscle fibres by repeated-intense training*

In a previous human study, four weeks of repeated-sprint training selectively increased the protein content of NKA  $\beta_1$  in type II muscle fibres (identified in individual fibre segments) (Wyckelsma *et al.*, 2015). In agreement, in the present study,  $\beta_1$  protein abundance was higher (44%) after training in type II fibres only. These observations, along with the increase in  $\alpha_1$  abundance in the present study, could indicate a need for improved NKA activity in this fibre type with intense training. In support, in rat gastrocnemius muscle, higher NKA hydrolytic activity was reported in membrane vesicles with a reduced (50 %) molar  $\alpha_2/\beta_1$  ratio caused by higher  $\beta_1$  content, relative to vesicles with a greater ratio (1.0) (Lavoie *et al.*, 1997). Although our data did not allow for quantification of the possible impact of training on  $\beta_2$  protein content, we were able to confidently show that  $\beta_2$  protein abundance is higher in type II, relative to type I, fibres (Fig. 4E). This is in accordance with a previous finding in individual fibre segments (27 % higher in type II fibres) (Wyckelsma *et al.*, 2015). As the  $K_m$  for Na<sup>+</sup> of  $\alpha/\beta_2$  heterodimers (7.5-13 mM) is higher than the corresponding  $K_m$  for  $\alpha/\beta_1$  complexes (4-5.5 mM) in rat skeletal muscles (Kristensen & Juel, 2010a), our findings raise the possibility that human muscle NKA activity may also be fibre type-dependent. Further research is needed to determine if NKA activity is fibre type-dependent in human muscle. It has been reported in humans that NKA  $\beta_3$  protein content is substantially elevated with age in whole muscle (2.5 fold), and in type I (1 fold) and II (3 fold) skeletal muscle fibres (McKenna *et al.*, 2012; Wyckelsma *et al.*, 2016). In rat skeletal muscles, a similar age-associated rise in  $\beta_3$  content was reversed by ~14 weeks of endurance training (Ng *et*

# *Regulation of Na<sup>+</sup>,K<sup>+</sup>-ATPase and FXYD1 by training and water immersion*

*al.*, 2003), indicating that regular, continuous muscle activity potently affects  $\beta_3$  content with age. We demonstrate here that brief, repeated-intense training substantially increases NKA  $\beta_3$  protein content (increase > 2 fold) in type I and II human muscle fibres. Thus, the type of muscle activity seems critical for  $\beta_3$  content of both muscle fibre types in humans. The rise in  $\beta_3$  content occurred in parallel with elevated  $\alpha_1$  protein abundance (Fig. 5A and 6B), suggesting an enhanced potential for  $\alpha_1/\beta_3$  complex assembly in both fibre types post training. This supports that the  $\beta_3$  isoform could take part in the maintenance of resting membrane potential in both contracting and non-contracting muscle fibres, in line with the ion transport function of  $\alpha_1$  (Radzyukevich *et al.*, 2013), although it could exert other yet unidentified functions in skeletal muscles.

## *Regulation of phospholemman (FXYD1) in human muscle fibre types by repeated, intense training*

Previous human studies using whole-muscle samples reported no alterations in FXYD1 protein abundance after 10 days to 8 weeks of intense training (Thomassen *et al.*, 2010; Benziene *et al.*, 2011; Nordsborg *et al.*, 2012; Skovgaard *et al.*, 2014). Conversely, we found that six weeks of intense training decreased FXYD1 abundance by 33 % in type I fibres (Fig. 6C). This decrease is reinforced by the large effect size (0.82), small confidence interval (22 %), and good reproducibility (CV < 22 %; Fig. 3C). However, FXYD1 abundance was unchanged in type II fibres (Fig. 6C), highlighting for the first time that FXYD1 is regulated in a fibre type-dependent manner by intense training in human muscle. These results underline that physiologically relevant adaptations may have been overlooked in the previous human studies due to their fibre type heterogeneous samples. But their use of sample fractionation, i.e. removal of an indefinite amount of protein (Murphy & Lamb, 2013), may also have influenced these previous outcomes. Co-localisation of unphosphorylated FXYD1 with  $\alpha/\beta$  heterodimers may inhibit their activation by increasing  $K_m$  (i.e. decreased affinity) for Na<sup>+</sup> and K<sup>+</sup> (Crambert *et al.*, 2002), whereas the interaction of FXYD1 with  $\alpha_1$  or  $\alpha_2$  isoforms remains unaffected by exercise (Benziene *et al.*, 2011). This suggests that the decline in type-I fibre FXYD1 abundance in the current study, independent of contraction-stimulated effects on its co-localisation with NKA  $\alpha/\beta$  complexes *per se*, may have been functionally important. Future training studies should combine coimmunoprecipitation analyses and measures of NKA function (e.g. maximal *in vitro* activity or muscle K<sup>+</sup> release during exercise), with fibre type-specific protein analyses to evaluate this possibility.

## *No effect of CWI on the effect of training on NKA-isoform protein abundance in different human muscle fibre types*

In the present study, post-exercise CWI was without effect on the fibre type-specific changes in NKA-isoform protein abundance with training. This underlines that CWI can be performed regularly after intense training sessions (or match play) by athletes, to utilise its potent placebo effect (Broatch *et*

# *Regulation of Na<sup>+</sup>,K<sup>+</sup>-ATPase and FXVD1 by training and water immersion*

*al.*, 2014), without adversely affecting training-induced changes in NKA-isoform abundance, and possibly, NKA function. Whether an absence of a CWI effect relates to an insufficiency to activate the molecular signalling events prerequisite to transcriptional and/or post-transcriptional modification cannot be resolved from the present study. However, our unpublished data reveal that a single session of post-exercise CWI transiently increases NKA  $\alpha_2$  mRNA content in skeletal muscle of healthy men, indicating a bout of CWI may augment the transcription, stabilisation, or both, of this NKA mRNA transcript in human muscle. The present results highlight that this transient effect of CWI does not translate into increased protein abundance after weeks of training. This raises the possibility that  $\alpha_2$  protein content is regulated, in part, by factors other than an increased potential for mRNA translation induced by higher mRNA content in response to repeated exercise sessions in human muscle.

## *Reliability of western blotting for NKA isoforms*

In many human studies, inferences about training-induced effects on the capacity of skeletal muscle for ion regulation were based, in part or fully, on modest changes (9-39 %) in protein abundance quantified using western blotting (Green *et al.*, 2004; Nielsen *et al.*, 2004; Iaia *et al.*, 2008; Thomassen *et al.*, 2010; Gunnarsson *et al.*, 2012). This is surprising considering these studies were limited by the use of fibre-type heterogeneous, fractionated samples (Murphy & Lamb, 2013), and, for some, no consideration of blot linearity (Mollica *et al.*, 2009) nor antibody lot validation. With the use of Stain Free imaging technology, wet transfer, and highly-sensitive chemiluminescence, we report that in our hands the technical error of western blotting using protein from a fibre segment of ~1-3 mm in length, amounting to ~15  $\mu$ g wet weight tissue, is of a similar magnitude (~10-30 %) as some of these previously reported changes (Fig. 3C). Our results highlight the importance of taking into account the reliability of western blotting when interpreting changes in muscle NKA-isoform protein abundance.

## *Conclusions and perspectives*

The effectiveness of intense intermittent training to improve the capacity of skeletal muscle for transmembrane Na<sup>+</sup>/K<sup>+</sup> transport in humans is well-documented. The present study revealed that these improvements may be ascribed, in part, to selective modulation of the protein abundance of NKA  $\beta_1$  in type II fibres, FXVD1 in type I fibres, and NKA  $\alpha_1$  and  $\beta_3$  in both fibre types. The insights gained from this study improve our understanding of how NKA function may regulated in different muscle fibre types to accommodate the need for Na<sup>+</sup> and K<sup>+</sup> transport during intense, intermittent exercise in human skeletal muscle. Furthermore, our data highlight that CWI can be performed on a regular basis without adversely affecting training-induced modulation of NKA-isoform protein abundance. Future work should assess protein responses in different muscle fibre types in

# Regulation of Na<sup>+</sup>,K<sup>+</sup>-ATPase and FXYP1 by training and water immersion

combination with measurements of muscle K<sup>+</sup> handling to elucidate the functional relevance of these fibre type-dependent protein responses to training.

## References

- Arystarkhova E & Sweadner KJ. (1996). Isoform-specific monoclonal antibodies to Na,K-ATPase alpha subunits. Evidence for a tissue-specific post-translational modification of the alpha subunit. *The Journal of biological chemistry* **271**, 23407-23417.
- Aughey RJ, Murphy KT, Clark SA, Garnham AP, Snow RJ, Cameron-Smith D, Hawley JA & McKenna MJ. (2007). Muscle Na<sup>+</sup>-K<sup>+</sup>-ATPase activity and isoform adaptations to intense interval exercise and training in well-trained athletes. *Journal of applied physiology* **103**, 39-47.
- Bangsbo J, Gunnarsson TP, Wendell J, Nybo L & Thomassen M. (2009). Reduced volume and increased training intensity elevate muscle Na<sup>+</sup>-K<sup>+</sup> pump alpha2-subunit expression as well as short- and long-term work capacity in humans. *Journal of applied physiology* **107**, 1771-1780.
- Benziane B, Widegren U, Pirkmajer S, Henriksson J, Stepto NK & Chibalin AV. (2011). Effect of exercise and training on phospholemman phosphorylation in human skeletal muscle. *American journal of physiology Endocrinology and metabolism* **301**, E456-466.
- Broatch JR, Petersen A & Bishop DJ. (2014). Postexercise cold water immersion benefits are not greater than the placebo effect. *Medicine and science in sports and exercise* **46**, 2139-2147.
- Clausen T. (2003). Na<sup>+</sup>-K<sup>+</sup> pump regulation and skeletal muscle contractility. *Physiological reviews* **83**, 1269-1324.
- Clausen T. (2013). Quantification of Na<sup>+</sup>,K<sup>+</sup> pumps and their transport rate in skeletal muscle: functional significance. *The Journal of general physiology* **142**, 327-345.
- Cohen J. (1988). Statistical power analysis for the behavioral sciences. **2nd edition**.
- Crambert G, Fuzesi M, Garty H, Karlish S & Geering K. (2002). Phospholemman (FXYP1) associates with Na,K-ATPase and regulates its transport properties. *Proceedings of the National Academy of Sciences of the United States of America* **99**, 11476-11481.
- Fowles JR, Green HJ & Ouyang J. (2004). Na<sup>+</sup>-K<sup>+</sup>-ATPase in rat skeletal muscle: content, isoform, and activity characteristics. *Journal of applied physiology* **96**, 316-326.
- Fuller W, Howie J, McLatchie LM, Weber RJ, Hastie CJ, Burness K, Pavlovic D & Shattock MJ. (2009). FXYP1 phosphorylation in vitro and in adult rat cardiac myocytes: threonine 69 is a novel substrate for protein kinase C. *American Journal of Physiology - Cell Physiology* **296**, C1346-C1355.
- Green HJ, Barr DJ, Fowles JR, Sandiford SD & Ouyang J. (2004). Malleability of human skeletal muscle Na<sup>(+)</sup>-K<sup>(+)</sup>-ATPase pump with short-term training. *Journal of applied physiology* **97**, 143-148.
- Gregson W, Allan R, Holden S, Phibbs P, Doran D, Campbell I, Waldron S, Joo CH & Morton JP. (2013). Postexercise cold-water immersion does not attenuate muscle glycogen resynthesis. *Medicine and science in sports and exercise* **45**, 1174-1181.
- Gunnarsson TP, Christensen PM, Holse K, Christiansen D & Bangsbo J. (2012). Effect of additional speed endurance training on performance and muscle adaptations. *Medicine and science in sports and exercise* **44**, 1942-1948.

# *Regulation of Na<sup>+</sup>,K<sup>+</sup>-ATPase and FXD1 by training and water immersion*

- Harmer AR, Ruell PA, McKenna MJ, Chisholm DJ, Hunter SK, Thom JM, Morris NR & Flack JR. (2006). Effects of sprint training on extrarenal potassium regulation with intense exercise in Type 1 diabetes. *Journal of applied physiology* **100**, 26-34.
- Hundal HS, Maxwell DL, Ahmed A, Darakhshan F, Mitumoto Y & Klip A. (1994). Subcellular distribution and immunocytochemical localization of Na,K-ATPase subunit isoforms in human skeletal muscle. *Molecular membrane biology* **11**, 255-262.
- Iaia FM, Thomassen M, Kolding H, Gunnarsson T, Wendell J, Rostgaard T, Nordsborg N, Krstrup P, Nybo L, Hellsten Y & Bangsbo J. (2008). Reduced volume but increased training intensity elevates muscle Na<sup>+</sup>-K<sup>+</sup> pump alpha1-subunit and NHE1 expression as well as short-term work capacity in humans. *American journal of physiology Regulatory, integrative and comparative physiology* **294**, R966-974.
- Juel C, Hostrup M & Bangsbo J. (2015). The effect of exercise and beta2-adrenergic stimulation on glutathionylation and function of the Na,K-ATPase in human skeletal muscle. *Physiological reports* **3**.
- Kristensen DE, Albers PH, Prats C, Baba O, Birk JB & Wojtaszewski JF. (2015). Human muscle fibre type-specific regulation of AMPK and downstream targets by exercise. *The Journal of physiology*.
- Kristensen M & Juel C. (2010a). Na<sup>+</sup>,K<sup>+</sup>-ATPase Na<sup>+</sup> affinity in rat skeletal muscle fiber types. *J Membr Biol* **234**, 35-45.
- Kristensen M & Juel C. (2010b). Potassium-transporting proteins in skeletal muscle: cellular location and fibre-type differences. *Acta physiologica* **198**, 105-123.
- Lavoie L, Levenson R, Martin-Vasallo P & Klip A. (1997). The molar ratios of alpha and beta subunits of the Na<sup>+</sup>-K<sup>+</sup>-ATPase differ in distinct subcellular membranes from rat skeletal muscle. *Biochemistry* **36**, 7726-7732.
- Lavoie L, Roy D, Ramlal T, Dombrowski L, Martin-Vasallo P, Marette A, Carpentier JL & Klip A. (1996). Insulin-induced translocation of Na<sup>+</sup>-K<sup>+</sup>-ATPase subunits to the plasma membrane is muscle fiber type specific. *The American journal of physiology* **270**, C1421-1429.
- Lucchesi PA & Sweadner KJ. (1991). Postnatal changes in Na,K-ATPase isoform expression in rat cardiac ventricle. Conservation of biphasic ouabain affinity. *The Journal of biological chemistry* **266**, 9327-9331.
- Malik N, Canfield VA, Beckers MC, Gros P & Levenson R. (1996). Identification of the mammalian Na,K-ATPase 3 subunit. *The Journal of biological chemistry* **271**, 22754-22758.
- McKenna MJ. (1995). Effects of training on potassium homeostasis during exercise. *Journal of molecular and cellular cardiology* **27**, 941-949.
- McKenna MJ, Bangsbo J & Renaud JM. (2008). Muscle K<sup>+</sup>, Na<sup>+</sup>, and Cl disturbances and Na<sup>+</sup>-K<sup>+</sup> pump inactivation: implications for fatigue. *Journal of applied physiology* **104**, 288-295.
- McKenna MJ, Perry BD, Serpiello FR, Caldow MK, Levinger P, Cameron-Smith D & Levinger I. (2012). Unchanged [3H]ouabain binding site content but reduced Na<sup>+</sup>-K<sup>+</sup> pump alpha2-protein abundance in skeletal muscle in older adults. *Journal of applied physiology* **113**, 1505-1511.
- McKenna MJ, Schmidt TA, Hargreaves M, Cameron L, Skinner SL & Kjeldsen K. (1993). Sprint training increases human skeletal muscle Na(+)-K(+)-ATPase concentration and improves K<sup>+</sup> regulation. *Journal of applied physiology* **75**, 173-180.



# Regulation of Na<sup>+</sup>,K<sup>+</sup>-ATPase and FXD1 by training and water immersion

- Mohr M, Krstrup P, Nielsen JJ, Nybo L, Rasmussen MK, Juel C & Bangsbo J. (2007). Effect of two different intense training regimens on skeletal muscle ion transport proteins and fatigue development. *American journal of physiology Regulatory, integrative and comparative physiology* **292**, R1594-1602.
- Mollica JP, Oakhill JS, Lamb GD & Murphy RM. (2009). Are genuine changes in protein expression being overlooked? Reassessing Western blotting. *Analytical biochemistry* **386**, 270-275.
- Murphy KT, Medved I, Brown MJ, Cameron-Smith D & McKenna MJ. (2008). Antioxidant treatment with N-acetylcysteine regulates mammalian skeletal muscle Na<sup>+</sup>-K<sup>+</sup>-ATPase alpha gene expression during repeated contractions. *Experimental physiology* **93**, 1239-1248.
- Murphy KT, Snow RJ, Petersen AC, Murphy RM, Mollica J, Lee JS, Garnham AP, Aughey RJ, Leppik JA, Medved I, Cameron-Smith D & McKenna MJ. (2004). Intense exercise up-regulates Na<sup>+</sup>,K<sup>+</sup>-ATPase isoform mRNA, but not protein expression in human skeletal muscle. *The Journal of physiology* **556**, 507-519.
- Murphy RM. (2011). Enhanced technique to measure proteins in single segments of human skeletal muscle fibers: fiber-type dependence of AMPK-alpha1 and -beta1. *Journal of applied physiology* **110**, 820-825.
- Murphy RM & Lamb GD. (2013). Important considerations for protein analyses using antibody based techniques: down-sizing Western blotting up-sizes outcomes. *The Journal of physiology* **591**, 5823-5831.
- Ng YC, Nagarajan M, Jew KN, Mace LC & Moore RL. (2003). Exercise training differentially modifies age-associated alteration in expression of Na<sup>+</sup>-K<sup>+</sup>-ATPase subunit isoforms in rat skeletal muscles. *American journal of physiology Regulatory, integrative and comparative physiology* **285**, R733-740.
- Nielsen JJ, Mohr M, Klarskov C, Kristensen M, Krstrup P, Juel C & Bangsbo J. (2004). Effects of high-intensity intermittent training on potassium kinetics and performance in human skeletal muscle. *The Journal of physiology* **554**, 857-870.
- Nordsborg NB, Siebenmann C, Jacobs RA, Rasmussen P, Diaz V, Robach P & Lundby C. (2012). Four weeks of normobaric "live high-train low" do not alter muscular or systemic capacity for maintaining pH and K(+) homeostasis during intense exercise. *Journal of applied physiology* **112**, 2027-2036.
- Radzyukevich TL, Neumann JC, Rindler TN, Oshiro N, Goldhamer DJ, Lingrel JB & Heiny JA. (2013). Tissue-specific role of the Na,K-ATPase alpha2 isozyme in skeletal muscle. *The Journal of biological chemistry* **288**, 1226-1237.
- Rasmussen MK, Kristensen M & Juel C. (2008). Exercise-induced regulation of phospholemman (FXD1) in rat skeletal muscle: implications for Na<sup>+</sup>/K<sup>+</sup>-ATPase activity. *Acta physiologica* **194**, 67-79.
- Roberts LA, Raastad T, Markworth JF, Figueiredo VC, Egner IM, Shield A, Cameron-Smith D, Coombes JS & Peake JM. (2015). Post-exercise cold water immersion attenuates acute anabolic signalling and long-term adaptations in muscle to strength training. *The Journal of physiology*.
- Salyer SA, Olberding JR, Distler AA, Lederer ED, Clark BJ, Delamere NA & Khundmiri SJ. (2013). Vacuolar ATPase driven potassium transport in highly metastatic breast cancer cells. *Biochimica et biophysica acta* **1832**, 1734-1743.
- Selman C, Grune T, Stolzing A, Jakstadt M, McLaren JS & Speakman JR. (2002). The consequences of acute cold exposure on protein oxidation and proteasome activity in short-tailed field voles, *Microtus agrestis*. *Free radical biology & medicine* **33**, 259-265.



# *Regulation of Na<sup>+</sup>,K<sup>+</sup>-ATPase and FXD1 by training and water immersion*

706 Skovgaard C, Christensen PM, Larsen S, Andersen TR, Thomassen M & Bangsbo J. (2014). Concurrent speed  
707 endurance and resistance training improves performance, running economy, and muscle NHE1 in moderately  
708 trained runners. *Journal of applied physiology* **117**, 1097-1109.

709  
710 Sweadner KJ, Herrera VL, Amato S, Moellmann A, Gibbons DK & Repke KR. (1994). Immunologic identification of  
711 Na<sup>+</sup>,K<sup>+</sup>-ATPase isoforms in myocardium. Isoform change in deoxycorticosterone acetate-salt hypertension.  
712 *Circ Res* **74**, 669-678.

713  
714 Thomassen M, Christensen PM, Gunnarsson TP, Nybo L & Bangsbo J. (2010). Effect of 2-wk intensified training and  
715 inactivity on muscle Na<sup>+</sup>-K<sup>+</sup> pump expression, phospholemman (FXD1) phosphorylation, and performance in  
716 soccer players. *Journal of applied physiology* **108**, 898-905.

717  
718 Thomassen M, Gunnarsson TP, Christensen PM, Pavlovic D, Shattock MJ & Bangsbo J. (2016). Intensive training and  
719 reduced volume increases muscle FXD1 expression and phosphorylation at rest and during exercise in  
720 athletes. *American journal of physiology Regulatory, integrative and comparative physiology*,  
721 *ajpregu.00081.02015*.

722  
723 Thomassen M, Murphy RM & Bangsbo J. (2013). Fibre type-specific change in FXD1 phosphorylation during acute  
724 intense exercise in humans. *The Journal of physiology* **591**, 1523-1533.

725  
726 Thompson CB & McDonough AA. (1996). Skeletal muscle Na,K-ATPase alpha and beta subunit protein levels respond  
727 to hypokalemic challenge with isoform and muscle type specificity. *The Journal of biological chemistry* **271**,  
728 32653-32658.

729  
730 Tumlin JA, Hoban CA, Medford RM & Sands JM. (1994). Expression of Na-K-ATPase alpha- and beta-subunit mRNA  
731 and protein isoforms in the rat nephron. *The American journal of physiology* **266**, F240-245.

732  
733 Vagin O, Tokhtaeva E & Sachs G. (2006). The role of the beta1 subunit of the Na,K-ATPase and its glycosylation in cell-  
734 cell adhesion. *The Journal of biological chemistry* **281**, 39573-39587.

735  
736 Versey NG, Halson SL & Dawson BT. (2013). Water immersion recovery for athletes: effect on exercise performance  
737 and practical recommendations. *Sports medicine* **43**, 1101-1130.

738  
739 Wyckelsma VL, McKenna MJ, Levinger I, Petersen AC, Lamboley CR & Murphy RM. (2016). Cell specific differences in  
740 the protein abundances of GAPDH and Na(+),K(+)-ATPase in skeletal muscle from aged individuals.  
741 *Experimental gerontology* **75**, 8-15.

742  
743 Wyckelsma VL, McKenna MJ, Serpiello FR, Lamboley CR, Aughey RJ, Stepto NK, Bishop DJ & Murphy RM. (2015).  
744 Single fiber expression and fiber-specific adaptability to short-term intense exercise training of Na<sup>+</sup>,K<sup>+</sup>-ATPase  
745 alpha and beta isoforms in human skeletal muscle. *Journal of applied physiology*, *jap.00419.02014*.

746  
747  
748  
749  
750  
751

*Regulation of Na<sup>+</sup>,K<sup>+</sup>-ATPase and FXVD1 by training and water immersion*

**Additional information**

**Competing interests**

The authors have no conflict of interest that relates to the content of this article.

**Author contributions**

Exercise testing and training were performed at Institute of Sport, Exercise and Active Living (ISEAL), Victoria University, Melbourne, VIC 3011. Antibody validation, reproducibility, and protein analyses were performed at the Department of Biochemistry and Genetics, La Trobe University, Melbourne, VIC 3086, Australia. All authors contributed to drafting and critically revising of this manuscript. DC, RMM, JRB and DJB contributed to the conception, design of experiments, and collection and analysis of data. DC RMM, JRB, MJM and DJB contributed to data interpretation. All authors approved the final version of this manuscript.

**Funding**

This study was partly funded by Exercise and Sports Science Australia (ESSA, no. ASSRG2011). DC was supported by an International Postgraduate Research Scholarship from Victoria University, Melbourne, VIC 3011, Australia.

**Acknowledgements**

We thank our participants for kindly donating parts of their muscle and for their efforts throughout the study. The monoclonal antibodies used to measure myosin heavy chain isoforms and the NKA  $\alpha_1$  isoform were obtained from the Development Studies Hybridoma Bank (DSHB) under the auspices of the NICHD and maintained by the University of Iowa, Department of Biological Sciences, Iowa City, IA 52242, USA. The antibodies directed against adult human MHC I and IIa isoforms (A4.840 and A4.74, respectively) were developed by Dr H. Blau, and the antibody directed against NKA  $\alpha_1$  (a6F) was developed by Dr D.M. Fambrough. We thank Hendrika Duivenvoorden, LaTrobe University, for providing the breast cancer cell lines.

# Regulation of Na<sup>+</sup>,K<sup>+</sup>-ATPase and FXYP1 by training and water immersion

## Legends

**Figure 1. A time-aligned schematic representation of the experimental setup.** Muscle was sampled at rest before exercise (Pre), 2 min post (+0h) and 3 h after (+3h) 15-min of passive rest at room temperature (CON group) or cold-water immersion up to the umbilicus (~10°C; COLD group) that followed the first intermittent, sprint training session. A final biopsy was sampled at rest 48-72 h following the last training session (Post) of six weeks of intense interval training either without (CON) or with cold-water immersion (COLD) after each training session. This study was part of a larger study. Muscle sampled at Pre and Post only was used for the current analyses.

**Figure 2. Validation of antibodies used to quantify Na<sup>+</sup>,K<sup>+</sup>-ATPase (NKA) isoforms and FXYP1.** Crude samples of human vastus lateralis (Hu) and rat skeletal muscles (EDL, extensor digitorum longus; Sol, soleus), rat cardiac muscle/heart (Hrt), kidney (Kid) and brain (B), breast cancer cell lines (M1, MDA-MB-231; M2, MCF10.Ca1d) and a control cell line (HEK, human embryonic kidney 293) were loaded onto 4-15% gradient, Criterion Stain Free gels. After SDS-PAGE, proteins were wet-transferred onto 0.45 µm nitrocellulose membrane. Membranes were incubated with antibodies raised against each of the NKA isoforms (α<sub>1-3</sub> in A, B and C; β<sub>1-3</sub> in D, E and F, respectively) or FXYP1 (G), post-treated with specific secondary antibodies and imaged using chemiluminescence. Isoform bands and molecular weight markers (lad) are shown in each image. In D, deglycosylation of human skeletal muscle samples were performed using PNGase incubation (3 h) at concentrations indicated in units (U). Recombinant β<sub>2</sub> protein (#Ag17818, Protein Tech) identical to the 64-171 aa derived from E.coli, PGEX-4T with N-terminal GST was used to verify the specificity of the β<sub>2</sub> antibody (E, *bottom panel*). See *Methods* section for additional details.

**Figure 3. Representative calibration curves (A), blots (B), and western blotting reproducibility (C) for Na<sup>+</sup>,K<sup>+</sup>-ATPase isoforms and FXYP1.** For every calibration curve, 5, 20, 30 and 60 µg w.w. of human vastus lateralis muscle was loaded onto the gels. To enable visualisation of all symbols, some data series in (A) and points in (B) were shifted by 1.70 units on the horizontal axis. Reproducibility was expressed as the coefficient of variation (CV), and calculated by normalising the density for a given loading amount to that of the slopes of the calibration curves for isoform blots and total protein on Stain Free gel. In B), total protein on Stain Free gels (*top panel*) and representative blots for the four-point calibration curves (*bottom panels*). Note that CV could not be calculated for the α<sub>3</sub> and β<sub>2</sub> isoforms for 60 µg w.w. muscle, as this point was excluded for some of the calibration curves due to saturation (cf. *Methods*).

*Regulation of Na<sup>+</sup>,K<sup>+</sup>-ATPase and FXYP1 by training and water immersion*

**Figure 4. Representative blots for the effect of training without (CON) or with (CWI) cold-water immersion on NKA-isoform protein abundance.** Total protein on Stain Free gels used for analysis (top panel), myosin heavy chain isoform expression of fibre pools (middle panel), and representative blots for NKA isoforms from the same run (bottom panel). Blots for NKA  $\alpha_1$ ,  $\alpha_2$  and  $\alpha_3$  are shown in A, B and C, and NKA  $\beta_1$ ,  $\beta_2$ ,  $\beta_3$  and FXYP1 in D, E, F and G, respectively.

**Figure 5. Effect of six weeks of repeated, intense training with (COLD) or without (CON) post-exercise cold-water immersion on Na<sup>+</sup>,K<sup>+</sup>-ATPase  $\alpha$ -isoform protein abundance in type I and II human skeletal muscle fibres.** A)  $\alpha_1$ , B)  $\alpha_2$ , and C)  $\alpha_3$  protein abundance. Individual values (left) and geometric mean  $\pm$  95% confidence intervals (right) are displayed on each graph for CON (● closed symbols) and COLD (○ open symbols). Each symbol represents one participant (left) and is the same for protein and gene data (Fig. 2). The horizontal, dotted line represents the geometric mean expression at Pre in CON. Muscle was sampled at rest before (Pre) and after 6 weeks of training (Post). \*p < 0.05, different from Pre within group; #p < 0.05, different from type I fibres based on pooled group data from both time points (please note the underscore of # for pooled group data).

**Figure 6. Effect of six weeks of repeated, intense training with (COLD) or without (CON) post-exercise cold-water immersion on Na<sup>+</sup>,K<sup>+</sup>-ATPase  $\beta$ -isoform and FXYP1 protein abundance in type I and II human skeletal muscle fibres.** A)  $\beta_1$ , B)  $\beta_3$ , and C) FXYP1 protein abundance. Individual values (left) and geometric mean  $\pm$  95% confidence intervals (right) on each graph for CON (● closed symbols) and COLD (○ open symbols). Each symbol represents one participant (left) and is the same for protein and gene data (Fig. 3). The horizontal, dotted line represents the geometric mean expression at Pre in CON. Muscle was sampled at rest before (Pre) and after 6 weeks of training (Post). Note the different scale on the secondary axis and that NKA  $\beta_2$  protein data were excluded from analysis. \*p < 0.05, different from Pre within group; #p < 0.05, different from pooled group data at Pre; #p < 0.05, Fibre type difference within time point; #p < 0.05, Fibre type difference within time point for pooled group data (please note the underscore of # and \* for pooled group data).

**Figure 7. Summary of key findings.** A) Effect of repeated, intense exercise training on the protein abundance of Na<sup>+</sup>,K<sup>+</sup>-ATPase isoforms ( $\alpha_{1-3}$  and  $\beta_{1-3}$ ) and phospholemman (FXYP1) in different muscle fibre types (type I and type II). Bold vertical lines without arrow indicate NKA isoforms that remained unchanged with the given intervention. B) Protein distribution of Na<sup>+</sup>,K<sup>+</sup>-ATPase isoforms ( $\alpha_{1-3}$  and  $\beta_{1-3}$ ) and phospholemman (FXYP1) in type I and type II fibres, and the effect of the training period on this distribution (Post).

Figures

Figure 1

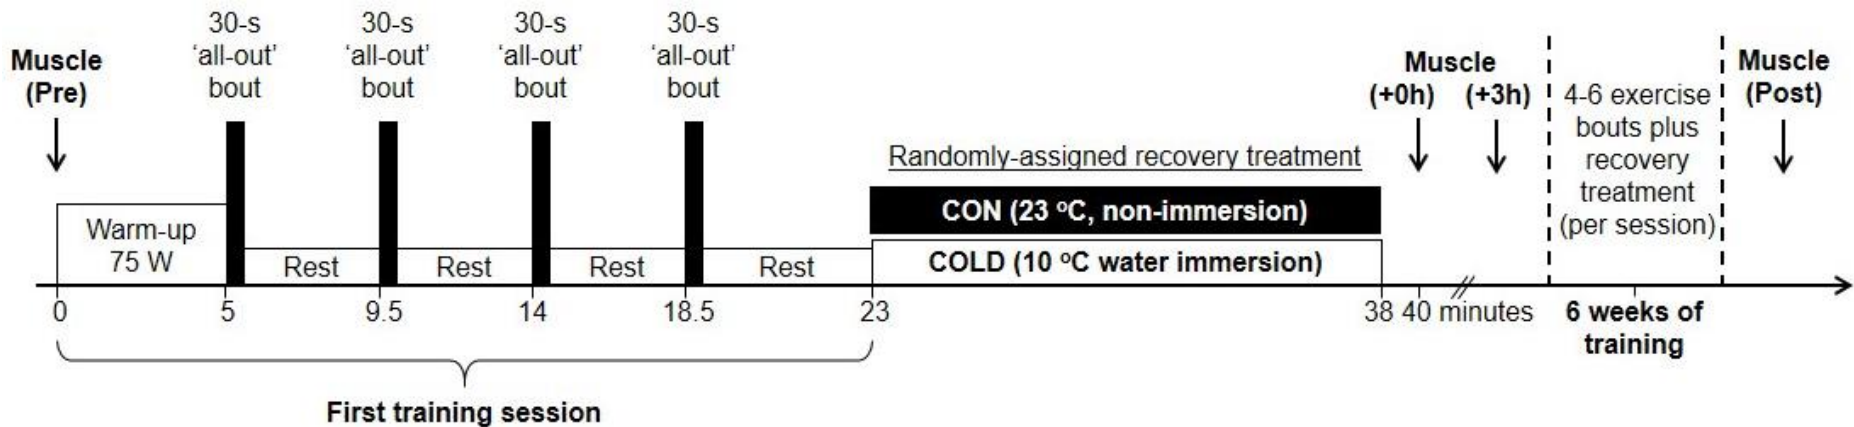

*Regulation of Na<sup>+</sup>,K<sup>+</sup>-ATPase and FXYD1 by training and water immersion*

**Figure 2**

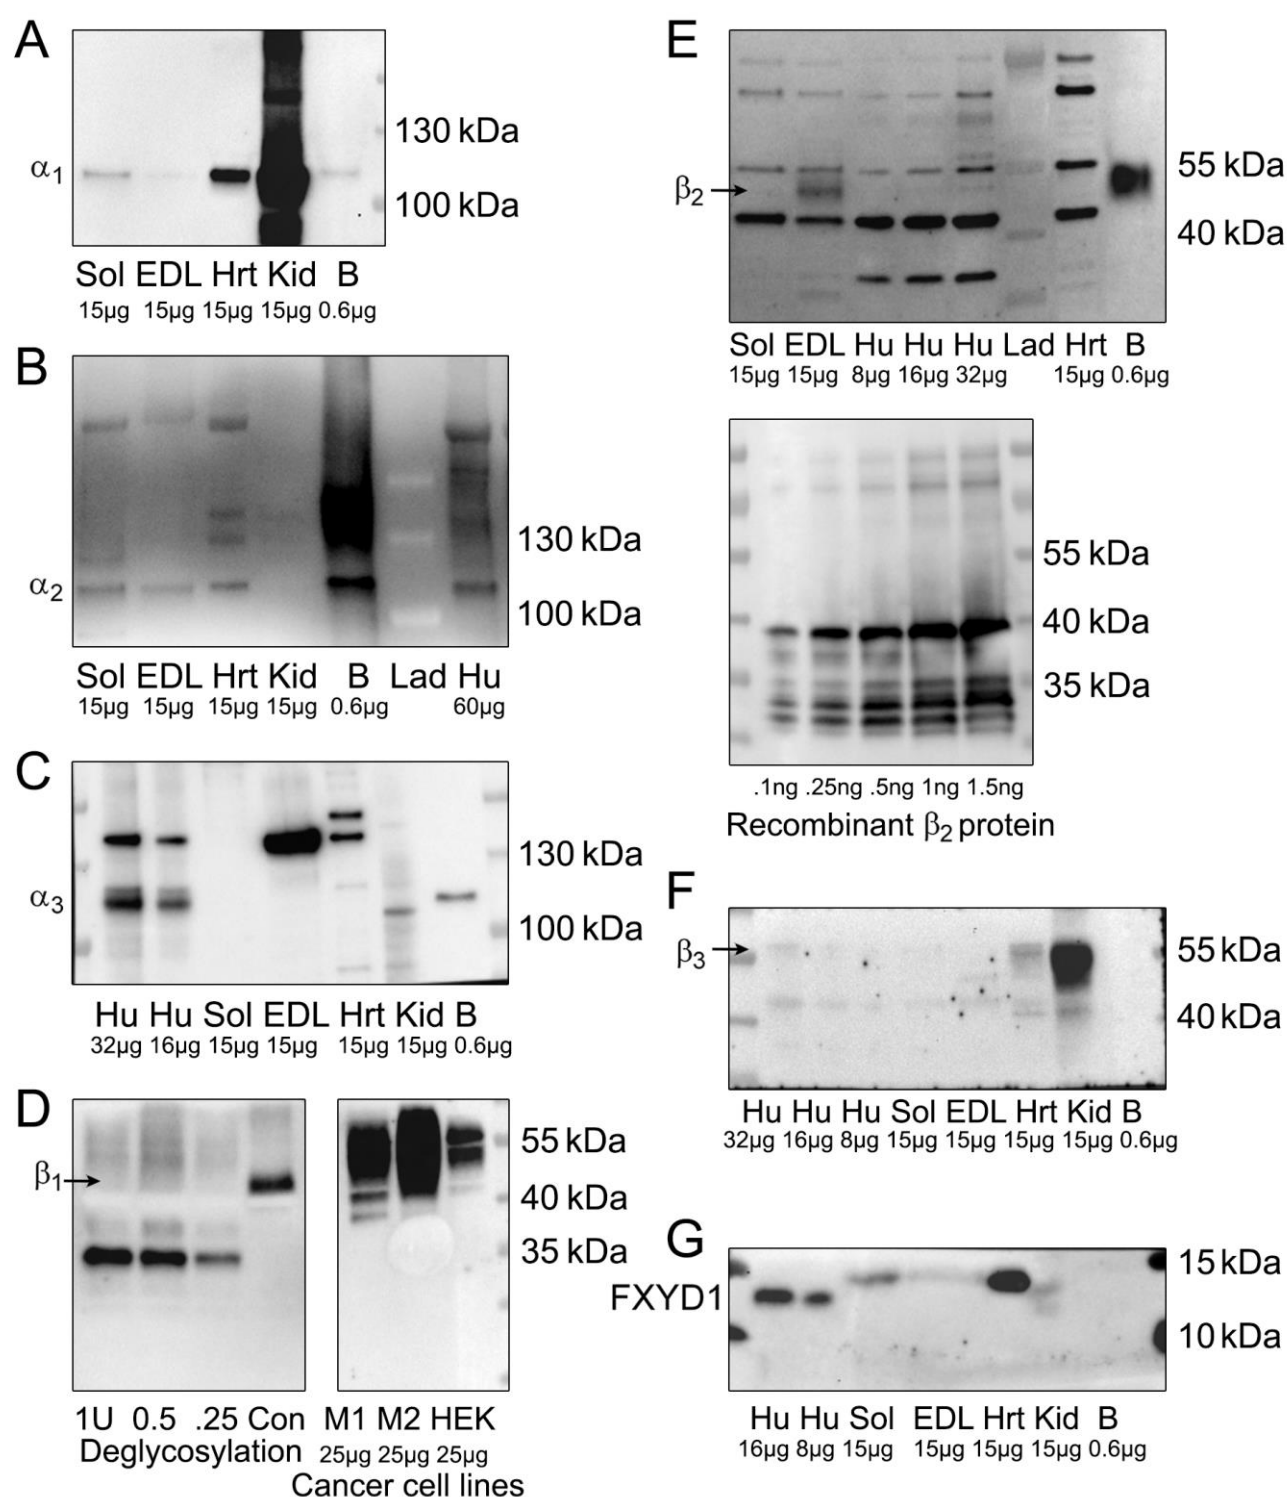



Regulation of Na<sup>+</sup>,K<sup>+</sup>-ATPase and FXYP1 by training and water immersion

865 **Figure 3**

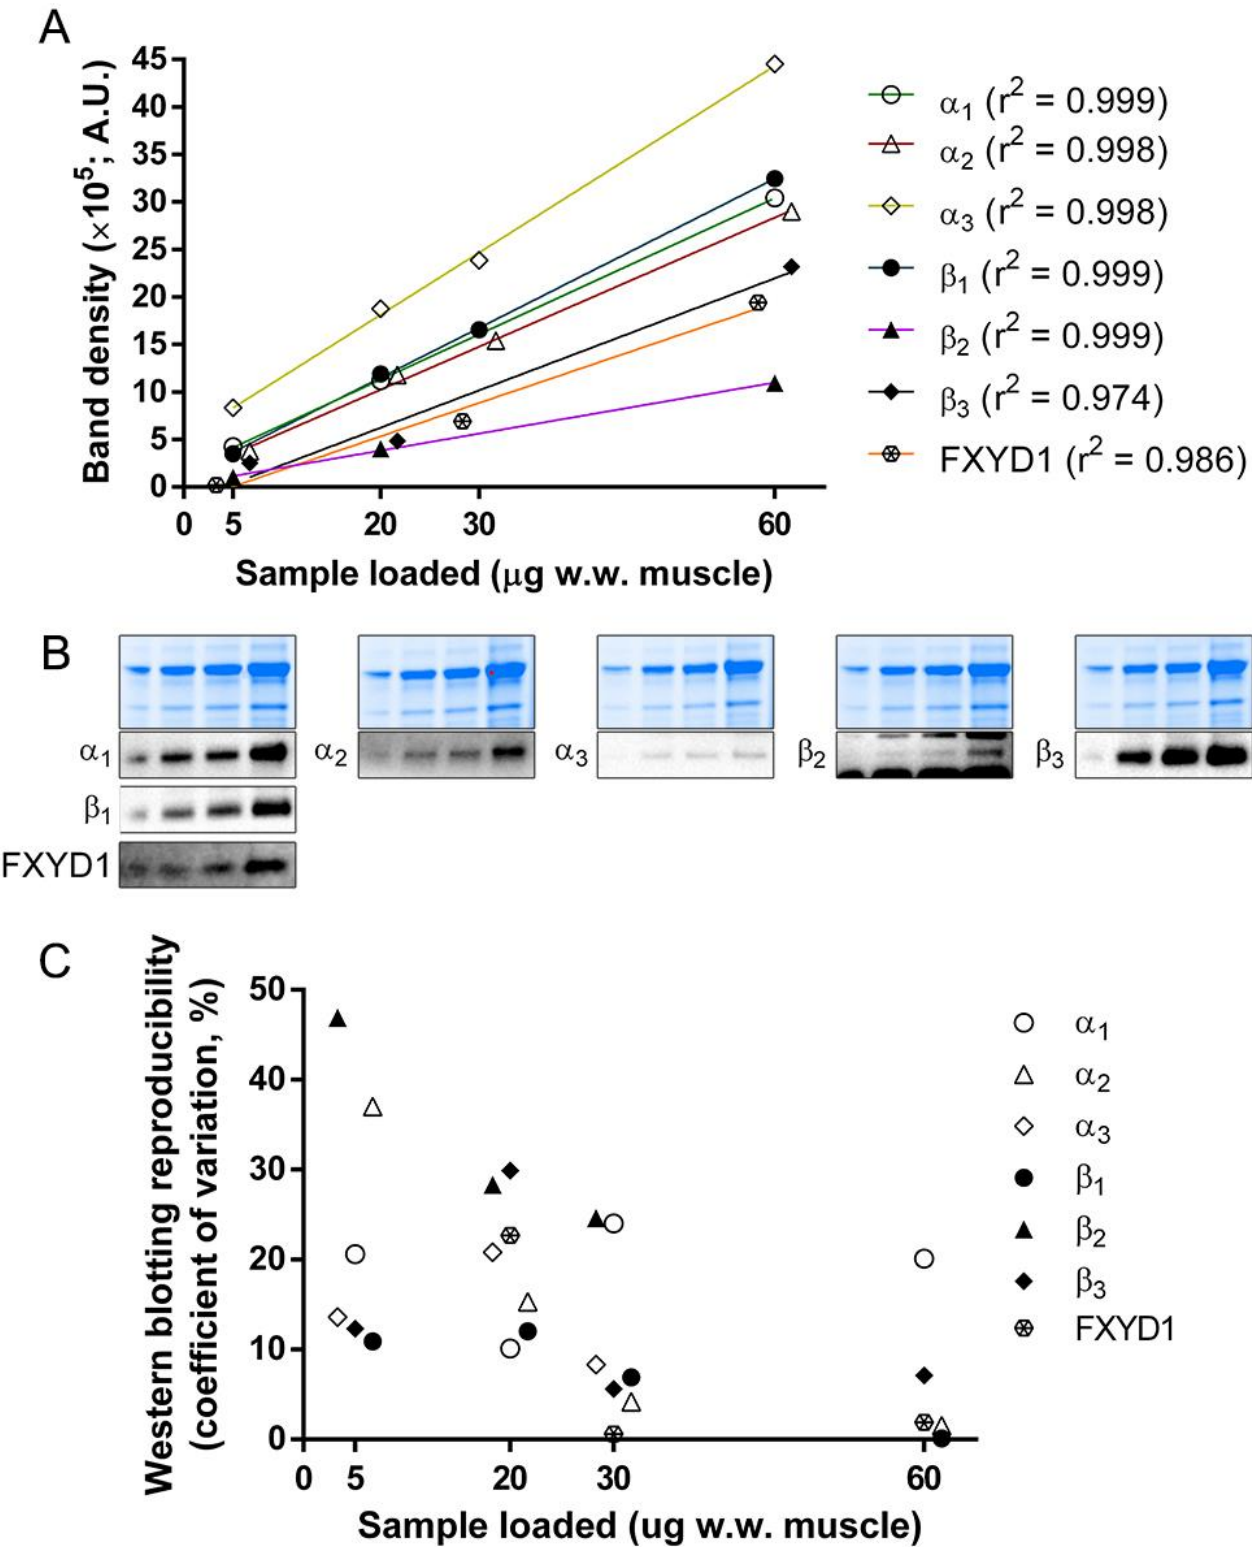

866  
867  
868

*Regulation of Na<sup>+</sup>,K<sup>+</sup>-ATPase and FXYP1 by training and water immersion*

**Figure 4**

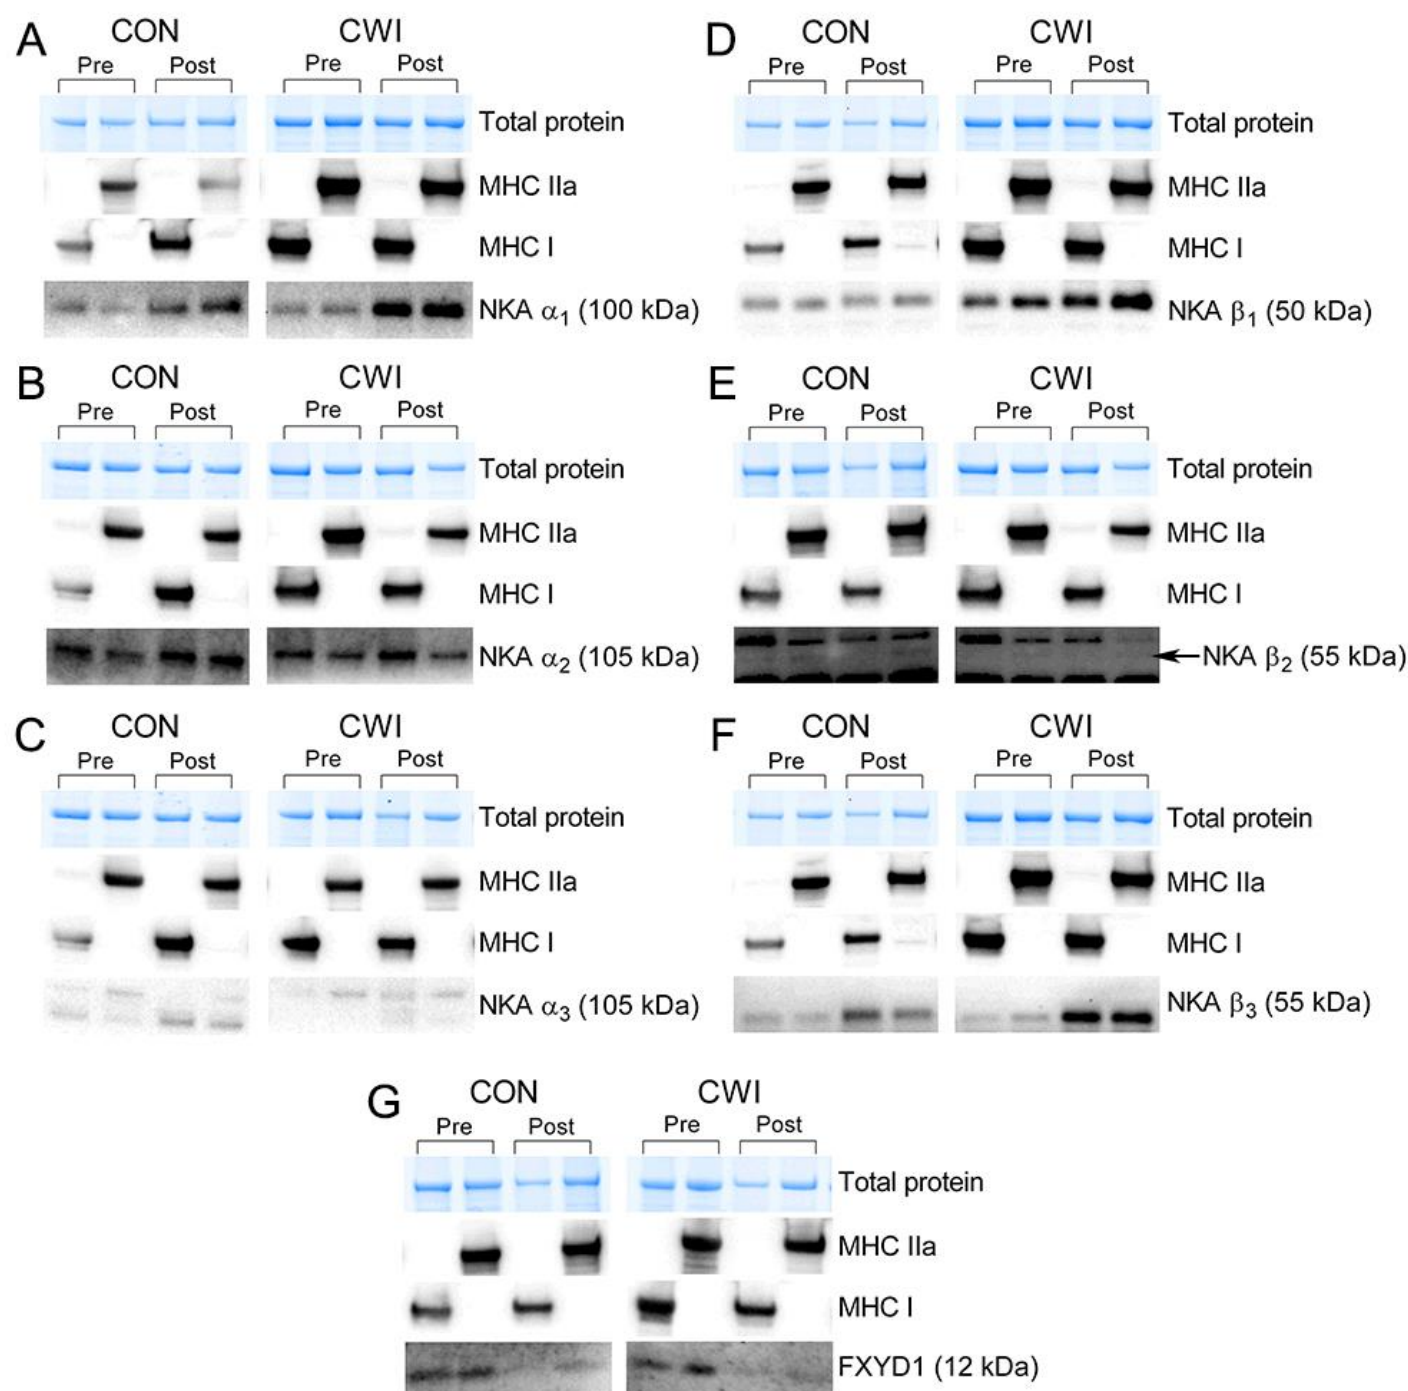

Regulation of Na<sup>+</sup>,K<sup>+</sup>-ATPase and FXD1 by training and water immersion

875 **Figure 5**

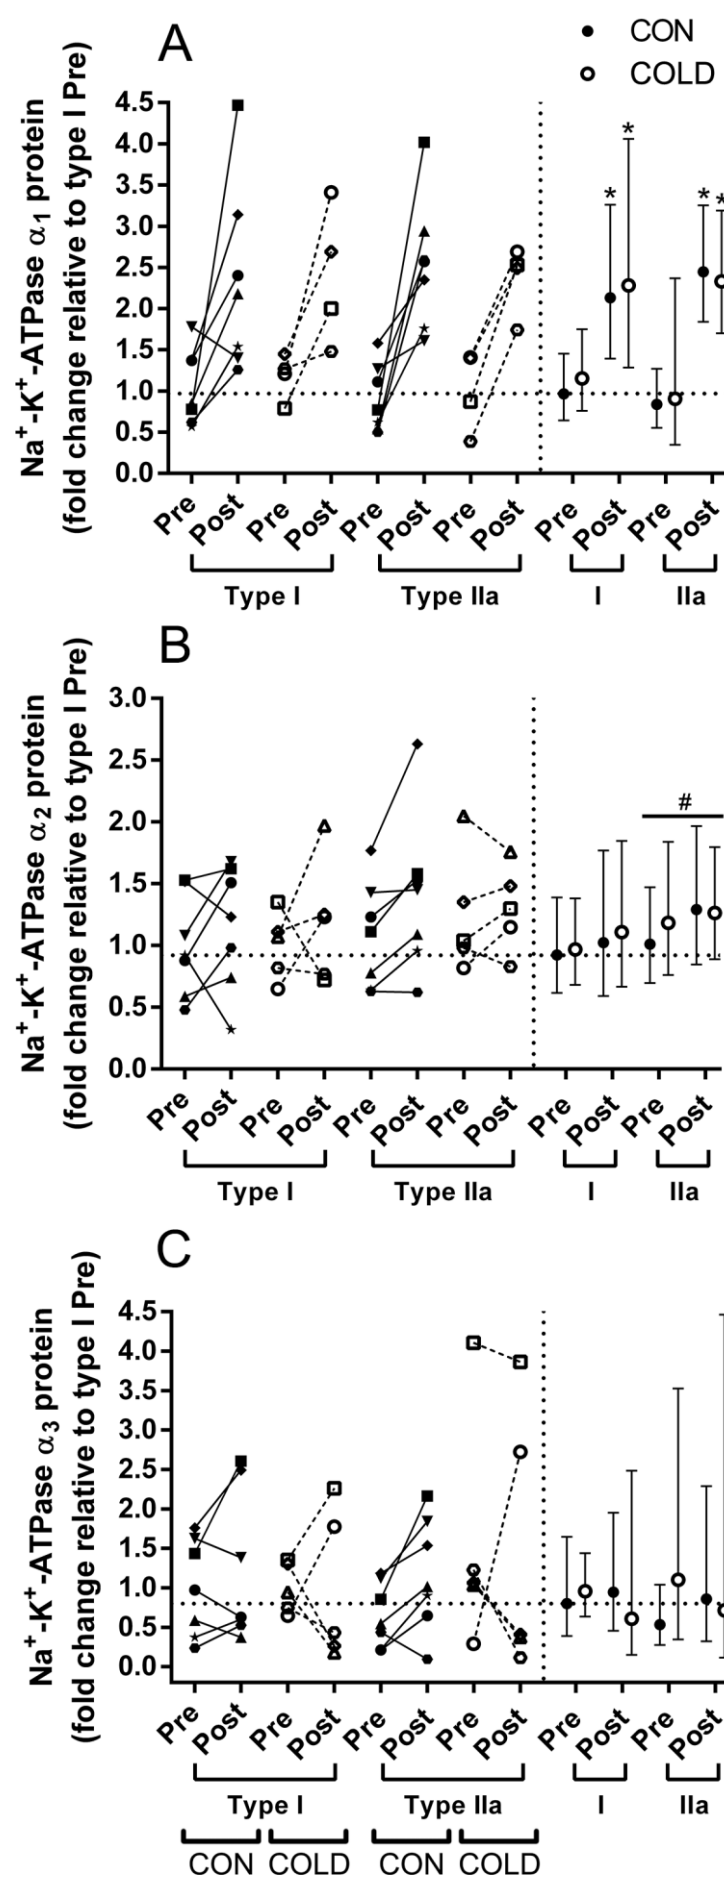

Regulation of Na<sup>+</sup>,K<sup>+</sup>-ATPase and FXYP1 by training and water immersion

876 **Figure 6**

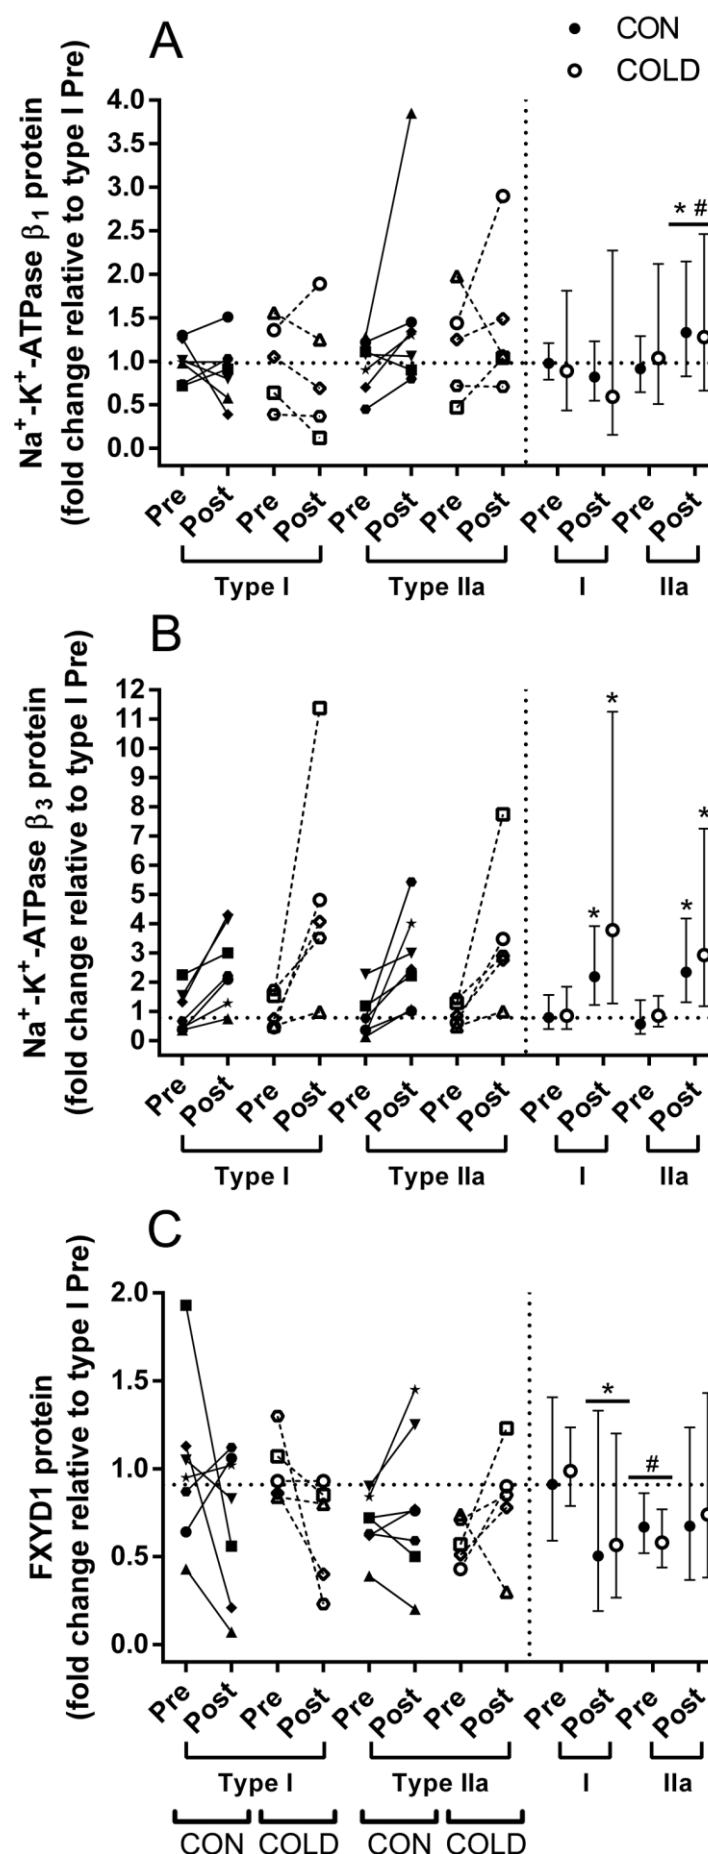

877 **Figure 7**

878

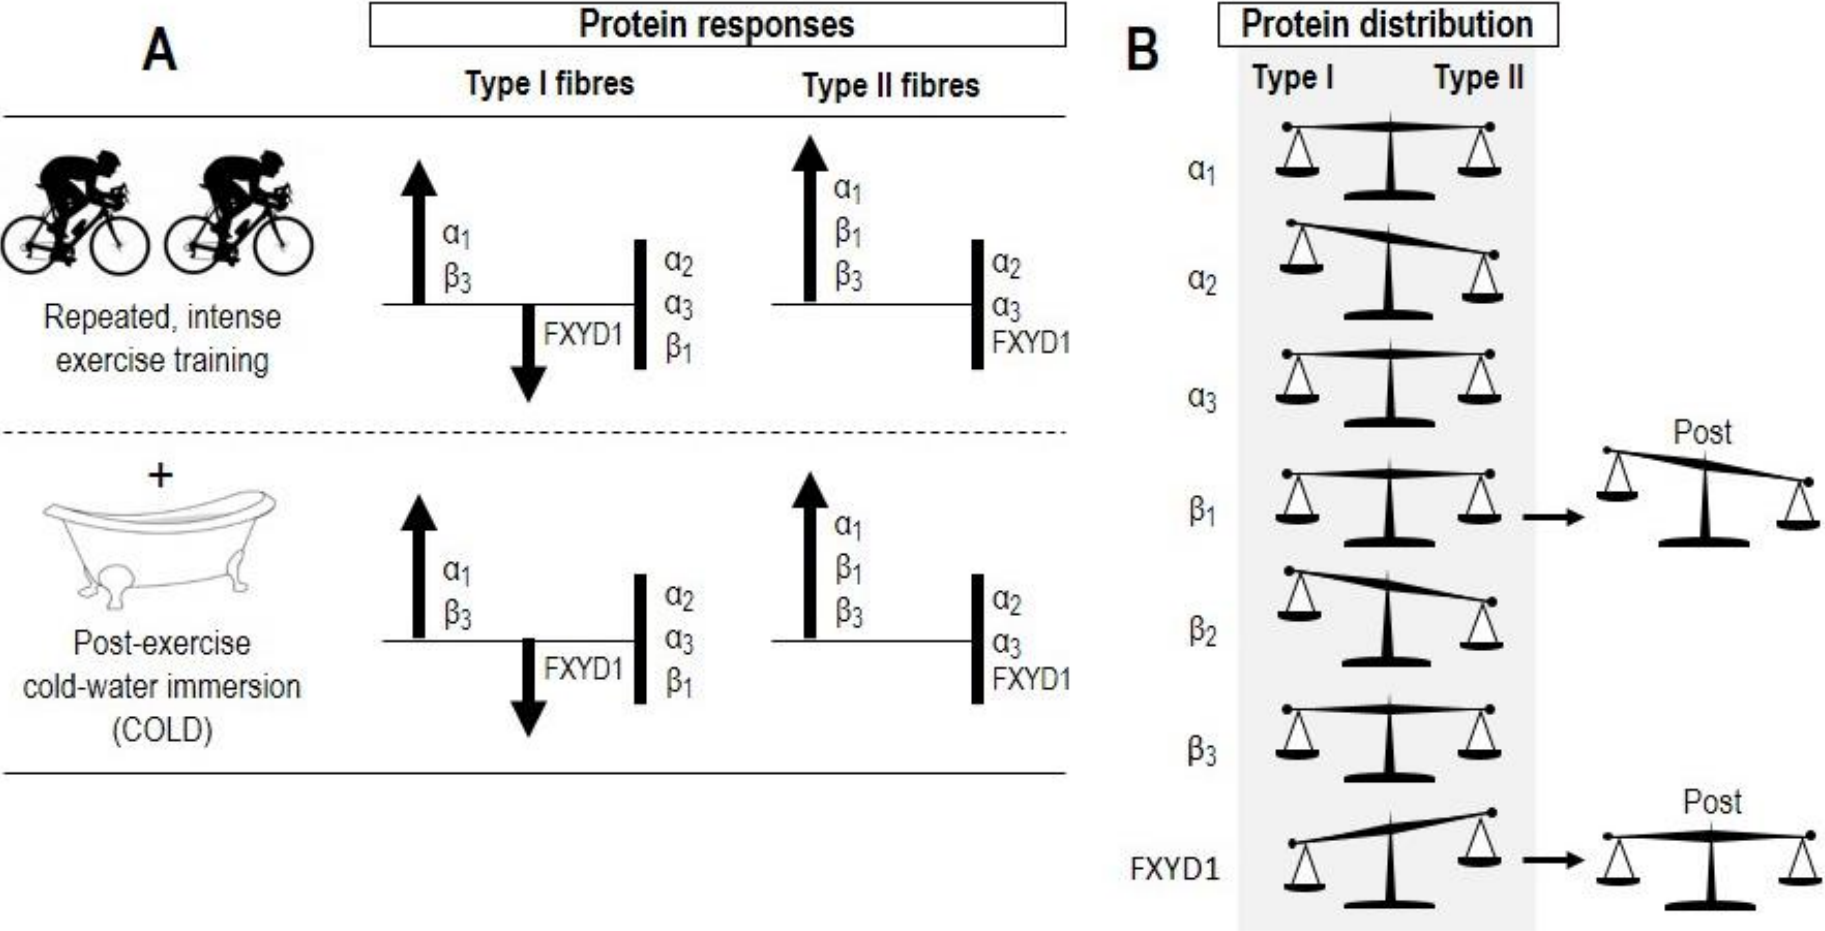

879 **Tables****Table 1.** Primary antibodies used for quantification of protein abundance of Na<sup>+</sup>,K<sup>+</sup>-ATPase isoforms, phospholemman (FXYP1) and myosin heavy chain isoforms in groups of type I or type II human skeletal muscle fibres

| Protein                                                | Primary antibody and supplier                                                              | Host species and isotype (antibody type) | Concentration | Molecular mass (kDa) |
|--------------------------------------------------------|--------------------------------------------------------------------------------------------|------------------------------------------|---------------|----------------------|
| Na <sup>+</sup> ,K <sup>+</sup> -ATPase α <sub>1</sub> | Developmental Studies Hybridoma Bank (DSHB), University of Iowa (#a6F-s, lot from 8/15/13) | Mouse IgG, (monoclonal)                  | 1:100         | ~100                 |
| Na <sup>+</sup> ,K <sup>+</sup> -ATPase α <sub>2</sub> | Merck Millipore (#07-674, lot #2444088)                                                    | Rabbit, IgG (polyclonal)                 | 1:5000        | ~105                 |
| Na <sup>+</sup> ,K <sup>+</sup> -ATPase α <sub>3</sub> | Thermo Fisher (#MA3-915, lot #NJ175778)                                                    | Mouse, IgG (monoclonal)                  | 1:1.000       | ~105                 |
| Na <sup>+</sup> ,K <sup>+</sup> -ATPase β <sub>1</sub> | Thermo Fisher (#MA3-930, lot #OH178971)                                                    | Mouse, IgG (monoclonal)                  | 1:10.000      | ~50                  |
| Na <sup>+</sup> ,K <sup>+</sup> -ATPase β <sub>2</sub> | United BioResearch, Proteintech (#22338-1-AP, lot #00022128)                               | Rabbit, IgG (polyclonal)                 | 1:500         | ~55                  |
| Na <sup>+</sup> ,K <sup>+</sup> -ATPase β <sub>3</sub> | BD Biosciences (#610992, lot #20600)                                                       | Mouse, IgG (monoclonal)                  | 1:500         | ~55                  |
| FXYP1                                                  | United BioResearch (Proteintech #13721-1-AP, lot #00015622)                                | Rabbit, IgG (polyclonal)                 | 1:5000        | ~12                  |
| MHC I                                                  | Developmental Studies Hybridoma Bank (DSHB), University of Iowa (#A4.840)                  | Mouse, IgM (monoclonal)                  | 1:200         | ~200                 |
| MHC IIa                                                | Developmental Studies Hybridoma Bank (DSHB), University of Iowa (#A4.74)                   | Mouse, IgG (monoclonal)                  | 1:200         | ~200                 |

MHC, myosin heavy chain; FXYP1, phospholemman. Antibodies were diluted in 1% bovine serum albumin in 1 × phosphate-buffered saline with 0.02% sodium azide and 0.025% Tween.



*Regulation of Na<sup>+</sup>,K<sup>+</sup>-ATPase and FXD1 by training and water immersion*

881
